1                   A Dendritic Disinhibitory Circuit Mechanism for  
2                                           Pathway-Specific Gating

3                   Guangyu Robert Yang<sup>1</sup>, John D. Murray<sup>1,2</sup>, Xiao-Jing Wang<sup>1,3</sup>

4                                           February 9, 2016

5   **Authors/Affiliations**

6   <sup>1</sup> Center for Neural Science, New York University, 4 Washington Place, New York, NY 10003

7   <sup>2</sup> Department of Psychiatry, Yale University School of Medicine, New Haven, CT 06511

8   <sup>3</sup> NYU-ECNU Institute of Brain and Cognitive Science, NYU Shanghai, Shanghai, China

9   **Contact**

10 Xiao-Jing Wang: xjwang@nyu.edu

11 **Running Title**

12 Gating through Dendritic Disinhibition

## 13 **Summary**

14 In this work we propose that a disinhibitory circuit motif, which recently gained experimental  
15 support, can instantiate flexible routing of information flow along selective pathways in a com-  
16 plex system of cortical areas according to behavioral demands (pathway-specific gating). We  
17 developed a network model of pyramidal neurons and three classes of interneurons, with con-  
18 nection probabilities constrained by data. If distinct input pathways cluster on separate den-  
19 dritic branches of pyramidal neurons, then a pathway can be gated-on by disinhibiting targeted  
20 dendrites. We show that this branch-specific disinhibition can be achieved despite dense in-  
21 terneuronal connectivity, even under the assumption of random connections. We found clus-  
22 tering of input pathways on dendrites can emerge through synaptic plasticity regulated by dis-  
23 inhibition. This gating mechanism in a neural circuit is further demonstrated by performing a  
24 context-dependent decision-making task. Our findings suggest a microcircuit architecture that  
25 harnesses dendritic computation and diverse inhibitory neuron types to subservise cognitive flex-  
26 ibility.

## 27 **Introduction**

28 Distinct classes of inhibitory interneurons form cell-type specific connections among them-  
29 selves and with pyramidal neurons in the cortex<sup>1,2</sup>. Interneurons expressing parvalbumin (PV)  
30 specifically target the perisomatic area of pyramidal neurons. Interneurons expressing somato-  
31 statin (SOM) specifically target thin basal and apical tuft dendrites of pyramidal neurons<sup>3</sup>. In-  
32 terneurons expressing vasoactive intestinal peptide (VIP) avoid pyramidal neurons and specif-  
33 ically target SOM neurons<sup>4</sup>. Long-range connections from cortical<sup>5,6</sup> or subcortical<sup>7</sup> areas can  
34 activate VIP neurons, which in turn suppress SOM neurons, and disinhibit pyramidal dendrites.  
35 This dendritic disinhibitory circuit formed by VIP and SOM neurons is proposed to gate the ex-  
36 citatory inputs targeting pyramidal dendrites<sup>8,9</sup> (**Fig. 1a**).

37 Insofar as any cortical area receives inputs from tens of other areas and project to many other  
38 areas, information flow across the complex cortical circuit needs to be flexibly gated (or routed)  
39 according to behavioral demands. Broadly speaking, there are three types of gating in terms of  
40 specificity. First, all inputs into a cortical area may be uniformly modulated up or down. Recent

41 research in mice demonstrated that such gating involves the disinhibitory motif mediated by VIP  
42 and SOM interneurons<sup>5,7,10-13</sup>. These studies generally found that VIP neurons are activated, and  
43 SOM neurons are inactivated, in response to changes in the animals' behavioral states, such as  
44 when mice receive reinforcement<sup>12</sup>, or start active whisking<sup>5,13</sup> or running<sup>7</sup>. The reported state  
45 change-related activity responses can be remarkably homogeneous across the local population  
46 of the same class of interneurons<sup>10,11</sup>.

47 Second, gating may involve selective information about a particular stimulus attribute or  
48 spatial location (for instance, in visual search or selective attention<sup>6</sup>). Whether SOM or VIP neu-  
49 rons are endowed with the required selectivity remains insufficiently known. In sensory cortex,  
50 SOM neurons exhibit greater selectivity to stimulus features (such as orientation of a visual stim-  
51 ulus) than PV neurons<sup>14,15</sup>. Furthermore, in motor cortex, SOM neurons have been shown to be  
52 highly heterogeneous and remarkably selective for forward versus backward movements (Adler  
53 & Gan, *Society for Neuroscience*, 2015).

54 Third, for a given task, neurons in a cortical area may need to “gate in” inputs from one of the  
55 afferent pathways, and “gate out” other afferent pathways<sup>16,17</sup>, which we call “pathway-specific  
56 gating”. For instance, imagine yourself sitting in a noisy cafe and trying to focus on your book.  
57 Your associational language areas receive converging inputs from both auditory and visual path-  
58 ways. Opening the gate for the visual pathway while closing the gate for the auditory pathway  
59 allows you to focus on reading (**Fig. 1b**). In the classic Stroop task, the subject is shown a colored  
60 word, and is asked to either name the color or read the word. One possible solution to this task  
61 is for a decision-making area to locally open its gate for the deliberate pathway (color-naming)  
62 while closing its gate for the more automatic pathway (word-reading).

63 Using computational models, we propose that the dendritic disinhibitory circuit can instan-  
64 tiate pathway-specific gating. Each of the many branches of a pyramidal dendrite process its  
65 inputs quasi-independently<sup>18</sup> and nonlinearly<sup>19</sup>. Feedforward and feedback pathways target  
66 different regions (e.g. basal or apical tuft) of dendritic trees of pyramidal neurons<sup>20</sup>. We hypoth-  
67 esize that excitatory inputs from different pathways can cluster onto parts of dendrites of pyra-  
68 midal neurons, which we term “branch-specific” even though inputs from a particular pathway  
69 may target multiple branches. This hypothesis is supported by mounting evidence for synap-  
70 tic clustering on dendritic branches<sup>21-23</sup>. A pathway can presumably be “gated-on” by specifi-

71 cally disinhibiting the branches targeted by this pathway (**Fig. 1c**), i.e. by a disinhibition pattern  
72 aligned with the excitation. This *branch-specific disinhibition* is motivated by findings showing  
73 that synaptic inhibition from SOM neurons can act very locally on dendrites, even controlling  
74 individual excitatory synapse by targeting the spine<sup>3</sup> or the pre-synaptic terminal<sup>24</sup>. In this work,  
75 we developed a network model with thousands of pyramidal neurons and hundreds of interneu-  
76 rons for each (VIP, SOM, and PV) type, and show that pathway-specific gating can be accom-  
77 plished by the disinhibitory motif, even though the connectivity from SOM neurons to pyramidal  
78 neurons is dense: each SOM neuron on average targets more than 60% of neighboring pyramidal  
79 neurons ( $< 200 \mu\text{m}$ )<sup>25</sup>.

80 We first characterized how branch-specific disinhibition can efficiently gate excitatory in-  
81 puts onto pyramidal dendrites. To then test whether the densely-connected interneuronal cir-  
82 cuit can indeed support branch-specific disinhibition, we built a dendritic disinhibitory circuit  
83 model constrained by experimentally measured single-neuron physiology and circuit connec-  
84 tivity. We found that although SOM-pyramidal connectivity is dense at the level of neurons, at  
85 the level of dendrites it is sufficiently sparse to support branch-specific disinhibition, and there-  
86 fore pathway-specific gating, given that SOM neurons can be selectively controlled. We then  
87 showed control inputs targeting both VIP and SOM neurons can selectively suppress SOM neu-  
88 rons as needed. Notably we drew these conclusions under some “worst-case” assumptions to  
89 our model such as random interneuronal connectivity. Using a calcium-based synaptic plas-  
90 ticity model, constrained by data, we found that disinhibitory regulation of plasticity can give  
91 rise to an appropriate alignment of excitation and disinhibition which is required for pathway-  
92 specific gating. Finally, we demonstrated the functionality of this mechanism in a circuit model  
93 performing an example context-dependent decision-making task<sup>26</sup>.

94 Our results suggest that, as an alternative to the proposal that SOM neurons act as a “blanket  
95 of inhibition”<sup>27</sup>, they can indeed subserve pathway-specific gating. This work predicts that top-  
96 down behavioral control involves rule signals targeting specific interneuron types rather than (or  
97 in addition to) pyramidal neurons, and that the disinhibitory motif plays a major role in synaptic  
98 plasticity.

## 99 Results

### 100 Pathway-specific gating with dendritic disinhibition

101 To study dendritic disinhibition, we first built a simplified neuron model with a reduced mor-  
102 phology, constrained to fit physiological data (**Fig. 2a, Supplementary Fig. 1**). It comprises  
103 one spiking somatic compartment, and multiple dendritic compartments which are electrically  
104 coupled to the soma but otherwise independent of each other. The somatic and dendritic com-  
105 partments have no spatial extent themselves. This choice of morphology is inspired by previous  
106 studies showing that different dendritic branches can integrate their local input independently  
107 from one another<sup>18</sup>.

108 A prominent feature of active processing in thin dendritic branches is their ability to produce  
109 NMDA plateau potentials<sup>28</sup>, also called NMDA spikes. The NMDA plateau potential is a regen-  
110 erative event in which the membrane potential increases nonlinearly and sometimes sharply  
111 with the NMDAR input, due to the release of voltage-dependent magnesium block of NMDARs.  
112 The reduced neuron model can exhibit NMDA plateau potential in dendrites (**Fig. 2b**), in line  
113 with simulations of morphologically reconstructed neuron models (**Supplementary Fig. 1**). The  
114 mean dendritic voltage in response to a Poisson spike train input is a sigmoidal function of the  
115 input rate, due to the NMDA plateau potential (light blue curve in **Fig. 2c**).

116 The NMDA plateau potential can be prevented by applying a moderate synaptic inhibition,  
117 mediated by GABA<sub>A</sub> receptors, to the same dendrite (dark blue curve in **Fig. 2c**). Inhibition is  
118 particularly effective in controlling this dendritic nonlinearity when excitatory inputs are medi-  
119 ated by NMDA receptors with experimentally-observed saturation, in stark contrast to AMPA re-  
120 ceptors (**Supplementary Fig. 1**) or NMDA receptors without saturation (**Supplementary Fig. 2**).  
121 Inhibitory input also linearizes the relationship between mean dendritic voltage and excitatory  
122 input rate (**Fig. 2c**), due to stochastic transitions into or out of NMDA plateau potential induced  
123 by low-rate inhibition (**Supplementary Fig. 2**). Therefore excitatory inputs to a dendritic branch  
124 can be efficiently gated by inhibition<sup>29</sup>.

125 We now consider multiple pathways of inputs targeting distinct sets of dendrites. In the de-  
126 fault condition, all dendritic branches receive a high baseline inhibition from dendrite-targeting  
127 SOM neurons<sup>5,13</sup>, closing gates for all pathways. Disinhibiting the branches targeted by one

128 pathway can selectively open the gate for this pathway while keeping the gates closed for other  
129 pathways (**Fig. 2d**). When a gate is open, the neuron's output firing rate transmits the stimulus  
130 selectivity of the corresponding input pathway most effectively (**Fig. 2e**).

131 When two excitatory pathways are activated simultaneously, we can plot the neuron's re-  
132 sponse to stimulus variables of both pathways, i.e. the two-dimensional tuning curve (**Fig. 2f,g**).  
133 In the default condition when all gates are closed, there is little response to either pathway (**Fig.**  
134 **2f**). By specifically disinhibiting the branches targeted by pathway 1, we can open the gate for  
135 pathway 1. With gate 1 opened, the neuron is primarily selective to pathway 1 stimuli (**Fig. 2g**).  
136 The remaining impact of pathway 2 stimuli is due to the fact that the impact of excitatory inputs  
137 can never be fully counteracted by dendritic inhibition.

138 The gating mechanism worsens when a fraction of excitatory input is mediated by AMPARs,  
139 but improves when a fraction of inhibitory input is mediated by GABA<sub>B</sub> receptors (**Supplementary**  
140 **Fig. 3**). Under *in vivo* conditions, the relative contribution of AMPAR-mediated inputs is likely  
141 quite low, as a result of a lower glutamate affinity and a stronger desensitization<sup>19</sup>. For parsimony,  
142 in the following sections, excitatory synaptic inputs are mediated only by NMDARs which  
143 are critical to the nonlinear dendritic computations, and inhibitory inputs are mediated only by  
144 GABA<sub>A</sub>Rs.

## 145 Performance of gating in pyramidal neurons

146 Which circuit properties determine the effectiveness of pathway-specific gating in our model? A  
147 neuron responds to its optimal stimulus from an input pathway with (baseline-corrected) firing  
148 rate ( $r_{\text{on}}$ ) when the pathway is gated-on, and ( $r_{\text{off}}$ ) when the pathway is gated-off, which could  
149 be readily measured experimentally. The gating selectivity is then quantified,

$$\text{Gating Selectivity} = \frac{r_{\text{on}} - r_{\text{off}}}{r_{\text{on}} + r_{\text{off}}}, \quad (1)$$

150 which ranges from 0 (no gating) to 1 (perfect gating). We developed a multi-compartmental rate  
151 model<sup>18</sup> that greatly improves the efficiency of the circuit model simulation. The rate model is  
152 fitted to quantitatively reproduce the activity of the spiking neuron model (**Supplementary Fig.**  
153 **4**, see Supplemental Information for details).

154 We first tested how gating selectivity depends on our assumption of branch-specific disinhi-

155 bition in a single-neuron setting. Here we assume an alignment of excitation and disinhibition  
156 patterns, which can be achieved through synaptic plasticity as shown later. Each excitatory path-  
157 way targets  $N_{\text{disinh}}$  randomly chosen dendrites, out of  $N_{\text{dend}}$  total dendrites, and this pathway is  
158 gated-on by specifically disinhibiting these same  $N_{\text{disinh}}$  dendrites (**Fig. 3a**). Due to the random  
159 independent selection of targeted dendrites for each pathway, inputs from two different path-  
160 ways often overlap.

161 We found that gating selectivity depends critically on the sparseness of the disinhibition (**Fig.**  
162 **3b**), defined as the proportion of targeted/disinhibited dendrites  $N_{\text{disinh}}/N_{\text{dend}}$ . Gating selectiv-  
163 ity improves when disinhibition patterns are sparsened, because the proportion of dendrites that  
164 receive overlapping inputs is reduced. We can approximate the limit of  $N_{\text{disinh}}/N_{\text{dend}} \rightarrow 0$  with  
165 non-overlapping disinhibition pattern (diamonds in **Fig. 3b,c**). In this case, the gating selectivity  
166 is highest but below 1, due to the remaining impact of inputs targeting inhibited dendrites, and  
167 is therefore modulated by the level of disinhibition (**Fig. 3c**).

### 168 **Pathway specific gating in an interneuronal circuit of SOM neurons**

169 We have shown that a key determinant of gating performance is the sparseness of innervation  
170 patterns onto the dendritic tree. Yet the connectivity from SOM interneurons to pyramidal neu-  
171 rons is dense<sup>25</sup>. Is it possible for the proposed gating mechanism to function in a cortical micro-  
172 circuit constrained by the dense interneuronal connectivity? To address this issue, we built an  
173 interneuronal circuit model, containing hundreds of VIP and SOM interneurons and thousands  
174 of pyramidal neurons, constrained by anatomical and physiological data. We considered “worst-  
175 case” conditions in which interneuronal connectivity is completely random (as our gating mech-  
176 anism can be facilitated by structured connectivity). Surprisingly, we found that relatively high  
177 gating performance is achievable under these conditions. We analyzed gating in this circuit in  
178 two steps: First, assuming SOM neurons are context-selective, we characterized how the SOM-  
179 pyramidal sub-circuit can support high gating selectivity. Second, we characterized how SOM  
180 neurons can become context-selective in the VIP-SOM-pyramidal circuit.

181 First, we built a simplified model of a SOM-pyramidal sub-circuit (**Fig. 4a**), which corre-  
182 sponds roughly to a cortical L2/3 column ( $400\mu\text{m} \times 400\mu\text{m}$ ). The model contains  $N_{\text{PYR}} (\approx 3,000)$   
183 multi-compartmental pyramidal neurons, each with  $N_{\text{dend}} (\approx 30)$  dendrites, and  $N_{\text{SOM}} (\approx 160)$

184 SOM neurons (see **Supplementary Table 1**). Here we analyze the dependence of gating selectiv-  
185 ity on the connectivity from SOM to pyramidal neurons. We consider worst-case conditions in  
186 which these connections are random, subject to the SOM-to-pyramidal connection probability  
187 of  $P_{\text{SOM} \rightarrow \text{pyr}}$  ( $\approx 0.6$ ). Assuming that a SOM neuron chooses to target each pyramidal dendrite  
188 independently with a SOM-to-dendrite connection probability of  $P_{\text{SOM} \rightarrow \text{dend}}$ , then we have

$$P_{\text{SOM} \rightarrow \text{dend}} = 1 - (1 - P_{\text{SOM} \rightarrow \text{pyr}})^{1/N_{\text{dend}}} \quad (2)$$

$$\approx P_{\text{SOM} \rightarrow \text{pyr}} / N_{\text{dend}}, \text{ for small } P_{\text{SOM} \rightarrow \text{pyr}} \quad (3)$$

189 Under this assumption, a SOM neuron on average targets  $N_{\text{dend}} \cdot P_{\text{SOM} \rightarrow \text{dend}} / P_{\text{SOM} \rightarrow \text{pyr}} \approx 1.5$  den-  
190 drites of a pyramidal neuron given that the two are connected. Each SOM-dendrite connection  
191 can correspond to multiple (3-5) clustered synapses<sup>30</sup>. So each SOM neuron can make on aver-  
192 age 5-8 synapses onto a pyramidal neuron. The connection probability between two neurons is  
193 higher at closer proximity<sup>25</sup>, leading to a even higher number of contacts.

194 In a default state, SOM neurons fire at a relatively high baseline rate around 10 Hz<sup>5,13</sup>, clos-  
195 ing the gates to all inputs. To open the gate for pathway 1, a randomly chosen subset (50%) of  
196 SOM neurons are suppressed, resulting in a pattern of disinhibition across dendrites. Again we  
197 assume the excitatory input pattern of pathway 1 is aligned with the corresponding disinhibition  
198 pattern. Notably, disinhibition patterns for different pathways generally overlap due to the ran-  
199 dom selection of SOM neurons and the random connectivity. This overlap can be reduced with  
200 either structured connections or inhibitory plasticity.

201 Under the above assumptions, the circuit achieves a mean gating selectivity around 0.5,  
202 equivalent to  $r_{\text{on}} \approx 3r_{\text{off}}$ . We found that the impact of these circuit parameters is determined  
203 by one critical parameter: the number of SOM neurons targeting each dendrite  $N_{\text{SOM} \rightarrow \text{dend}} =$   
204  $N_{\text{SOM}} \cdot P_{\text{SOM} \rightarrow \text{dend}} \approx 5$  (**Fig. 4b**, see also Supplemental Mathematical Appendix). When we vary  
205 parameters while keeping  $N_{\text{SOM} \rightarrow \text{dend}}$  fixed, the gating selectivity remains largely constant (**Fig.**  
206 **4c-e**). We found that gating selectivity is highest when  $N_{\text{SOM} \rightarrow \text{dend}}$  is small (**Fig. 4f**), and de-  
207 creases as we increases  $N_{\text{SOM} \rightarrow \text{dend}}$ . Because the overall strength of inhibition has a simple effect  
208 on the gating selectivity (**Fig. 3c**), we keep it fixed when varying other parameters.

209 Each dendrite should more appropriately be interpreted as an independent computational  
210 unit. When inhibitory connections control individual excitatory connection through pre-synaptic



211 receptors<sup>24</sup> or by targeting spines<sup>3</sup>, the independent unit would be single excitatory synapses.  
212 This leads to a lower effective value of  $N_{\text{SOM} \rightarrow \text{dend}}$ , then a higher gating selectivity.

### 213 **Pathway specific gating in an interneuronal circuit of SOM and VIP neurons**

214 Having analyzed the SOM-pyramidal connectivity, we next examined how SOM neurons can be  
215 context-selective, and characterized the gating selectivity in a circuit model containing VIP, SOM,  
216 and pyramidal neurons. On top of the previous SOM-pyramidal sub-circuit, We added  $N_{\text{VIP}}$  VIP  
217 neurons that only target SOM neurons<sup>4</sup>. Here we assume VIP neurons target all SOM neurons  
218 with connection probability  $P_{\text{VIP} \rightarrow \text{SOM}}$ . Broadly speaking, we found two scenarios in which SOM  
219 neurons can be suppressed selectively based on the context, depending on the targets of the  
220 top-down or locally-generated control inputs (**Fig. 5**).

221 In the first scenario, control inputs target VIP neurons solely (**Fig. 5a**). In this intuitive sce-  
222 nario, control inputs excite VIP neurons, which in turn inhibit SOM neurons thereby disinhibit-  
223 ing pyramidal dendrites. Gating selectivity is high only if a small proportion of VIP neurons is  
224 targeted by control (**Fig. 5b**), indicating that VIP neurons must be context-selective, and VIP-  
225 SOM connections need to be sparse (**Fig. 5c**). VIP-SOM connectivity could possibly be effectively  
226 sparse on the scale of a cortical column, since the axonal arbor of VIP neurons are rather spatially  
227 restricted<sup>31</sup>. When varying parameters, we kept fixed the overall baseline inhibition received by  
228 each SOM neuron and the overall strength of control inputs.

229 In the second scenario, excitatory control inputs target both VIP and SOM neurons (**Fig. 5d**).  
230 If the VIP-SOM connectivity is dense, then VIP neurons activated by control inputs will provide  
231 nearly uniform inhibition across all SOM neurons (**Supplementary Fig. 5**). However, SOM neu-  
232 rons can receive selective excitation if the control inputs only directly target a subset of SOM  
233 neurons. If the inhibition is on average stronger, then the overall effect is a selective suppression  
234 of SOM neurons (**Supplementary Fig. 5**). As a result, gating selectivity no longer depends on  
235 the proportion of VIP neurons targeted by control inputs, but does depend on the proportion of  
236 SOM neurons targeted (**Fig. 5e**). Therefore SOM neurons are context-selective, but VIP neurons  
237 need not be. Similarly, gating selectivity does not depend on the connection probability from  
238 VIP to SOM neurons,  $P_{\text{VIP} \rightarrow \text{SOM}}$  (**Fig. 5f**).

239 In summary, in order to achieve branch-specific disinhibition, control inputs targeting in-

240 terneurons have to be selective. Notably, the level of specificity required for the control inputs  
241 depends strongly on the neurons they target. When targeting only VIP neurons, the control in-  
242 puts have to be highly selective (**Fig. 5a,b**). However, when control inputs target both VIP and  
243 SOM neurons, high gating selectivity can be achieved in a much broader range of parameters,  
244 reducing the level of specificity required (**Fig. 5d,e**).

### 245 **Pathway specific gating in an interneuronal circuit of SOM, VIP, and PV neurons**

246 PV neurons receive inhibition from themselves and SOM neurons, and project to perisomatic ar-  
247 eas of pyramidal neurons<sup>1</sup>. Suppression of SOM neurons therefore also leads to disinhibition of  
248 PV neurons and an increase of somatic inhibition onto pyramidal neurons. We included PV neu-  
249 rons into our interneuronal circuit model (**Fig. 6a**), and found that this inclusion and the con-  
250 sequent increase in somatic inhibition strictly improve gating selectivity in a wide range of pa-  
251 rameters (**Fig. 6b**). Since the SOM-to-PV and PV-to-pyramidal neuron connections are dense<sup>27</sup>,  
252 a selective pattern of SOM suppression will result in an elevated somatic inhibition that is al-  
253 most uniform across pyramidal neurons (**Supplementary Fig. 6**). Furthermore, we proved that  
254 an uniform increase in somatic inhibition will always improve gating selectivity, except when the  
255 somatic inhibition is unreasonably strong (see **Supplemental Mathematical Appendix**).

256 For an intuitive explanation, consider a linear input-output function in the soma. Gating  
257 selectivity is based on the relative difference between the pyramidal neuron responses when  
258 the gate is open ( $r_{on}$ ) and when the gate is closed ( $r_{off}$ ). Providing an equal amount of somatic  
259 inhibition in these two conditions is equivalent to subtracting both values by the same constant,  
260 which will enhance the relative difference.

### 261 **Inhibitory modulation of synaptic plasticity and learning pathway-specific gating**

262 A critical feature of our scheme is the alignment between excitation and disinhibition patterns  
263 (**Fig. 1c**): pyramidal dendrites targeted by an excitatory input pathway are also disinhibited when  
264 the gate is open for that pathway. Dendritic disinhibition can regulate synaptic plasticity<sup>32,33</sup>. We  
265 hypothesized that such an alignment can naturally arise as a result of the regulated plasticity. To  
266 test this hypothesis, we first established a realistic calcium-based plasticity model for dendrites  
267 in our reduced spiking neuron model. Pre- and post-synaptic spikes induce calcium transients

268 in dendrites, which determine the synaptic weight changes<sup>34</sup> (**Fig. 7a**). We fitted parameters of  
269 the model to capture experimental data<sup>35</sup> (**Supplementary Fig. 7**). Our model also quantitatively  
270 predicts findings that were not used in the fitting.

271 The calcium-based plasticity model allows us to naturally study the effects of dendritic dis-  
272 inhibition on synaptic plasticity and their functional implications. Again we assume that pre-  
273 and post-synaptic firings are Poisson spike trains with specified rates. We found that dendritic  
274 inhibition can shift the plasticity from potentiation to depression, even when the pre-synaptic  
275 excitatory input rate and the post-synaptic firing rate are both kept constant (**Fig. 7b**), consis-  
276 tent with previous modeling findings<sup>33</sup>. We note that plasticity models based solely on pre- and  
277 post-synaptic neuronal firing would not predict the inhibitory modulation of synaptic plasticity.

278 We then tested whether disinhibitory regulation of plasticity can support the development of  
279 excitation-disinhibition alignment, as needed for pathway-specific gating (**Fig. 7c**). Importantly,  
280 the strength of disinhibition is realistic, similar to those used throughout this paper. Initially,  
281 excitatory synapses from each pathway are uniformly distributed across the dendritic branches  
282 of single neurons. Different excitatory pathways are then activated one at a time. Whenever a  
283 pathway is presented, a particular subset of dendrites are disinhibited, while the rest of the den-  
284 drites remain inhibited. Through calcium-based excitatory plasticity, the activated excitatory  
285 synapses targeting the disinhibited dendrites become strengthened, whereas those targeting the  
286 inhibited dendrites become weakened. Synapses not activated remain the same regardless of  
287 the inhibition level (see **Fig. 7b**). After learning, the alignment of excitation and disinhibition  
288 patterns support pathway-specific gating (**Fig. 7d,e**; compare with **Fig. 2e**), with a gating selec-  
289 tivity around 0.7. These findings show that a key aspect of the gating architecture, namely the  
290 alignment of excitation and disinhibition patterns, can emerge naturally from the interaction  
291 between excitatory synaptic plasticity and context-dependent disinhibition.

### 292 **Modeling a flexible behavior with pathway-specific gating**

293 How is gating at the neural level related to gating at the behavioral level? Is moderate gating  
294 selectivity (e.g.,  $\sim 0.5$  as above) sufficient to explain performances in flexible cognitive tasks? To  
295 address these issues, we applied our model to a context-dependent decision-making task<sup>26</sup>. In  
296 this task, the behavioral response should be based on either the motion direction or the color of

297 a random-dots motion stimulus, depending on the context cued by a rule signal (**Fig. 8a**).

298 We built a stylized neural circuit model to implement this task using pathway-specific gat-  
299 ing through dendritic disinhibition (**Fig. 8b**). The local circuit comprises a sensory network and  
300 a decision network. The sensory network contains pyramidal neurons that receive convergent  
301 sensory inputs from both motion and color pathways, and they group into four pools accord-  
302 ing to their selectivities to color and motion evidence. The dendrites of pyramidal neurons are  
303 controlled by the VIP-SOM interneuronal circuit described above (**Fig. 8c, 5d**). A subset of pyra-  
304 midal neurons with high gating selectivity projects to the decision network. Pyramidal neurons  
305 representing color and motion evidence for the same target project to the corresponding deci-  
306 sion neural pool. The decision network, as modeled previously<sup>36</sup>, is a strongly recurrent network  
307 that generates a winner-take-all decision based on its inputs.

308 We fitted the performance of the model to a monkey's psychometric behavioral data from  
309 [26], using three free parameters in the model, namely the proportion of sensory neurons that  
310 project to the decision network, and the overall connection strengths from the input pathways to  
311 the sensory network and from the sensory network to the decision network. By fitting these three  
312 parameters, we obtained a quantitative match of the empirical psychometric performance, as a  
313 function of relevant (**Fig. 8e**) and irrelevant (**Fig. 8f**) features. Our model shows that the impact of  
314 the irrelevant information should be stronger when the relevant information is more ambiguous  
315 (with lower motion coherence, for instance) (**Fig. 8g**). Although at its default parameters the  
316 interneuronal circuit model can show similar task performance as the empirical data, we found  
317 that it can no longer fit the empirical performance if we significantly degrade the neural gating  
318 selectivity (**Supplementary Fig. 8**). This simulation therefore serves as a proof-of-principle to  
319 demonstrate the potential of dendritic disinhibition as a mechanism for pathway-gating, and as  
320 a link to assess the utility of neural gating selectivity in terms of flexible behavioral performance.

## 321 Discussion

322 A canonical cortical microcircuit motif specialized for disinhibition of pyramidal neuron den-  
323 drites was proposed theoretically<sup>8</sup> and has received strong empirical support from a series of  
324 recent experiments<sup>4-7,12,13,37</sup>. Here we explored the functional roles of dendritic disinhibition

325 using computational modeling, at both the single-neuron and circuit levels. In contrast to so-  
326 matic disinhibition, dendritic disinhibition can gate the inputs to a neuron<sup>8,29</sup>. We propose that  
327 dendritic disinhibition can be utilized to gate inputs from separate pathways, by specifically dis-  
328 inhibiting dendrites that receive inputs from a target pathway.

329 We studied the effectiveness of gating in an interneuronal circuit constrained by experimen-  
330 tal data, which have become available only in recent years thanks to the advance of optogenetics  
331 and other experimental tools. Where data are not available, we considered the “worst-case sce-  
332 nario”, namely, connections from VIP to SOM neurons, and from SOM to pyramidal dendrites are  
333 completely random, which is most likely not the case<sup>38</sup> and any specificity would facilitate our  
334 proposed mechanism. Although the SOM-to-pyramidal connections are dense, we found that  
335 the connectivity from SOM neurons to pyramidal dendrites are actually sparse enough to sup-  
336 port branch-specific disinhibition. We found that the increase of somatic inhibition mediated  
337 by the SOM-PV-pyramidal neuron connections further improves gating selectivity. We demon-  
338 strated that branch-specific clustering of excitatory pathways can naturally emerge from disin-  
339 hibitory regulation of synaptic plasticity. As proof of principle, we applied this mechanism to a  
340 model for a recent experiment using a context-dependent decision-making task<sup>26</sup>.

341 Inhibitory connections in cortex tend to be dense<sup>25</sup>. This finding has led to the proposal that  
342 cortical inhibition functions as a locally non-selective “blanket of inhibition”<sup>27</sup>. In contrast, our  
343 study offers an alternative perspective, which is compatible with dense interneuronal connectiv-  
344 ity and has very different implications for circuit functions. The dense connectivity is measured  
345 on a cell-to-cell level. Nonetheless, connections from dendrite-targeting SOM interneurons can  
346 be sparse at the level of the dendritic branch, and therefore potentially selective as required for  
347 our gating scheme. Our alternative proposal is fundamentally grounded in consideration of den-  
348 dritic branches as functional units of computation<sup>18</sup>.

### 349 **Circuit requirements for pathway-specific gating**

350 A key assumption and prediction of our model is clustering of excitatory pathways onto pyrami-  
351 dal neuron dendritic branches. The computational benefits of input clustering have been previ-  
352 ously proposed<sup>39</sup>. There is mounting experimental evidence for input clustering, from anatom-  
353 ical and physiological studies<sup>21,22</sup> [for a review see 23]. Consistent with our model, experimental

354 studies have shown that input clustering can emerge through NMDAR-dependent synaptic plas-  
355 ticity<sup>40</sup>, and that clustering is functionally related to learning<sup>22,41</sup>. Our model assumption that  
356 branch-specific clustering occurs at the level of pathways remains to be directly tested.

357 Another feature necessary for our mechanism is the alignment between excitation and dis-  
358 inhibition, which we found can be achieved through synaptic plasticity on excitatory synapses.  
359 This feature could also potentially be achieved through inhibitory plasticity<sup>42</sup>, by adapting the  
360 disinhibition pattern to align with fixed excitatory inputs. These two forms of plasticity are com-  
361 plementary, and both are likely at play. Indeed, a recent study found that during motor learning,  
362 spine reorganization on dendrites of pyramidal neurons is accompanied by change in the num-  
363 ber of SOM-neuron synapses onto these dendrites<sup>38</sup>. One appeal of studying excitatory plasticity  
364 here is that our calcium-based plasticity model could be quantitatively constrained by data and  
365 therefore tested in a biologically plausible regime. At present, much less is known experimentally  
366 about the dependence of inhibitory plasticity on pre- and post-synaptic spike timing, dendritic  
367 calcium levels, or the class of interneuron<sup>43</sup>.

### 368 **Model predictions**

369 Our model makes specific, experimentally testable predictions. One of the most straightfor-  
370 ward and testable predictions is that SOM neurons should show context/rule selectivity in some  
371 context-dependent or rule-based tasks. Surprisingly, we found that VIP neurons need not be  
372 context-selective, as long as SOM neurons are directly receiving context-selective excitatory con-  
373 trol inputs (**Fig. 5d-f**). Experimental disruption of these context-selective interneurons should  
374 impair the animal's ability to perform context- or rule-dependent choice tasks. The context-  
375 selectivity of SOM or VIP neurons is not necessarily presented in every behavioral task. For in-  
376 stance, a recent study, recording in mouse prefrontal cortex during an auditory discrimination  
377 task, found highly homogeneous responses within SOM and VIP populations<sup>10</sup>. We propose that  
378 SOM neurons are more likely to exhibit selectivity to context or task in experiments in which the  
379 animal performs multiple tasks and branch-specific dendritic spikes also exhibit task selectivity  
380 [e.g., 44, Adler & Gan, *Society for Neuroscience*, 2015]. A direct test of our model awaits future  
381 experiments in a task-switching paradigm in order to examine gating of different pathways into  
382 association cortical areas and the selective changes of activity in SOM neural subpopulations.

383 We emphasize that interneuron classes in our model should be more appropriately interpreted  
384 according to their projection targets rather than their biochemical markers.

385 Branch-specific dendritic spikes are already observed experimentally, and SOM neurons are  
386 critical for this branch-specificity<sup>44</sup>. It is however unknown whether SOM-mediated inhibition is  
387 also branch-specific. Direct patch-clamping of pyramidal-neuron dendrites *in vivo*<sup>45</sup> can isolate  
388 inhibitory currents on individual branches, and provide a direct test for our hypothesis, although  
389 such an experiment is technically difficult at present. Our plasticity model predicts that SOM  
390 interneurons play a critical role in the learning-related emergence of branch-specific clustering  
391 of excitatory synapses on pyramidal neuron dendrites<sup>22</sup>.

### 392 **Relation to other gating models**

393 Flexible gating, or routing, of information has been a long-standing problem in computational  
394 neuroscience<sup>46</sup>, for which a number of models have been proposed. Among proposed ideas are  
395 dynamic synaptic weight modulation<sup>47</sup>, gain modulation<sup>46</sup>, synchrony in the input signals<sup>16</sup>,  
396 perfect balance of excitation and inhibition<sup>17</sup>, up/down state-switch in dendrites<sup>48</sup>, switching  
397 between different neural pools that receive inputs from distinct pathways<sup>49</sup>, and rule signaling  
398 as a selection vector<sup>26</sup>. Gating cortico-cortical communication has also been proposed as a role  
399 of the basal ganglia<sup>50</sup>. Notably, most of these models implement a form of soft gating, which  
400 modulates the effective strength of incoming pathways instead of performing a binary on-off  
401 switch on them.

402 These prior models did not exploit the computational power of dendrites (except for [48])  
403 or the roles of specialized classes of interneurons. Harnessing dendrites rather than popula-  
404 tions of intermediate neurons saves the number of neurons needed by many-fold. Only in the  
405 limit of one dendrite per pyramidal neuron does our mechanism become conceptually similar  
406 to gating mechanisms operating on the neuronal level<sup>49</sup>. Furthermore, we propose a concrete  
407 microcircuit mechanism for dendritic gating that is constrained by empirical findings and makes  
408 a number of testable predictions.

409 The gating mechanism as studied here is nonlinear but not binary. In the biologically plausi-  
410 ble regime of inhibitory strength studied here, shunting inhibition on a dendritic branch still al-  
411 lows synaptic input to appreciably elevate the dendritic voltage and thus impact the soma, which

412 decreases the gating selectivity of the neuron. Gating selectivity is also limited by the number of  
413 dendritic branches (or more generally, quasi-independent computational units) on a pyramidal  
414 neuron. Due to these limitations, our mechanism may be better suited to coarse gating of dis-  
415 tinct pathways rather than transmission of more fine-grained top-down signals. Multiple mech-  
416 anisms may jointly contribute to gating function, and our proposed mechanism is most likely  
417 compatible with the aforementioned proposals.

## 418 **Supplemental Information**

419 Supplemental Information includes eight figures, two tables and a Supplemental Mathematical  
420 Appendix.

## 421 **Author Contributions**

422 G.R.Y., J.D.M., and X.-J.W. designed the research, discussed regularly throughout the project and  
423 wrote the manuscript. G.R.Y. performed the research.

## 424 **Acknowledgments**

425 We thank Michael Higley, Alex Kwan, Jorge Jaramillo, and Francis Song for comments on an  
426 earlier version of the manuscript. Funding was provided by National Institute of Health grant  
427 R01MH062349 and Office of Naval Research grant N00014-13-1-0297 (X.-J.W.).



- 428 1. Markram, H. *et al.* Interneurons of the neocortical inhibitory system. *Nat Rev Neurosci* **5**,  
429 793–807 (2004).
- 430 2. Jiang, X. *et al.* Principles of connectivity among morphologically defined cell types in adult  
431 neocortex. *Science* **350**, aac9462 (2015).
- 432 3. Chiu, C. Q. *et al.* Compartmentalization of GABAergic inhibition by dendritic spines. *Sci-*  
433 *ence* **340**, 759–62 (2013).
- 434 4. Pfeffer, C. K., Xue, M., He, M., Huang, Z. J. & Scanziani, M. Inhibition of inhibition in visual  
435 cortex: the logic of connections between molecularly distinct interneurons. *Nat Neurosci*  
436 **16**, 1068–76 (2013).
- 437 5. Lee, S., Kruglikov, I., Huang, Z. J., Fishell, G. & Rudy, B. A disinhibitory circuit mediates  
438 motor integration in the somatosensory cortex. *Nat Neurosci* **16**, 1662–70 (2013).
- 439 6. Zhang, S. *et al.* Long-range and local circuits for top-down modulation of visual cortex pro-  
440 cessing. *Science* **345**, 660–5 (2014).
- 441 7. Fu, Y. *et al.* A cortical circuit for gain control by behavioral state. *Cell* **156**, 1139–52 (2014).
- 442 8. Wang, X.-J., Tegnér, J, Constantinidis, C & Goldman-Rakic, P. S. Division of labor among  
443 distinct subtypes of inhibitory neurons in a cortical microcircuit of working memory. *Proc*  
444 *Natl Acad Sci U S A* **101**, 1368–73 (2004).
- 445 9. Kepecs, A. & Fishell, G. Interneuron cell types are fit to function. *Nature* **505**, 318–26 (2014).
- 446 10. Pinto, L. & Dan, Y. Cell-Type-Specific Activity in Prefrontal Cortex during Goal-Directed Be-  
447 havior. *Neuron* **87**, 437–450 (2015).
- 448 11. Kvitsiani, D *et al.* Distinct behavioural and network correlates of two interneuron types in  
449 prefrontal cortex. *Nature* **498**, 363–6 (2013).
- 450 12. Pi, H.-J. *et al.* Cortical interneurons that specialize in disinhibitory control. *Nature* **503**, 521–  
451 4 (2013).
- 452 13. Gentet, L. J. *et al.* Unique functional properties of somatostatin-expressing GABAergic neu-  
453 rons in mouse barrel cortex. *Nat Neurosci* **15**, 607–12 (2012).
- 454 14. Ma, W.-p. *et al.* Visual representations by cortical somatostatin inhibitory neurons—selective  
455 but with weak and delayed responses. *J Neurosci* **30**, 14371–9 (2010).

- 456 15. Li, L.-Y. *et al.* Differential Receptive Field Properties of Parvalbumin and Somatostatin In-  
457 hibitory Neurons in Mouse Auditory Cortex. *Cereb Cortex* **25**, 1782–91 (2015).
- 458 16. Akam, T. & Kullmann, D. M. Oscillations and filtering networks support flexible routing of  
459 information. *Neuron* **67**, 308–20 (2010).
- 460 17. Vogels, T. P. & Abbott, L. F. Gating multiple signals through detailed balance of excitation  
461 and inhibition in spiking networks. *Nat Neurosci* **12**, 483–91 (2009).
- 462 18. Poirazi, P., Brannon, T. & Mel, B. W. Pyramidal neuron as two-layer neural network. *Neuron*  
463 **37**, 989–99 (2003).
- 464 19. Major, G., Larkum, M. E. & Schiller, J. Active properties of neocortical pyramidal neuron  
465 dendrites. *Annu Rev Neurosci* **36**, 1–24 (2013).
- 466 20. Petreanu, L., Mao, T., Sternson, S. M. & Svoboda, K. The subcellular organization of neocor-  
467 tical excitatory connections. *Nature* **457**, 1142–5 (2009).
- 468 21. Druckmann, S. *et al.* Structured synaptic connectivity between hippocampal regions. *Neu-*  
469 *ron* **81**, 629–40 (2014).
- 470 22. Yang, G. *et al.* Sleep promotes branch-specific formation of dendritic spines after learning.  
471 *Science* **344**, 1173–8 (2014).
- 472 23. Kastellakis, G., Cai, D. J., Mednick, S. C., Silva, A. J. & Poirazi, P. Synaptic clustering within  
473 dendrites: An emerging theory of memory formation. *Prog Neurobiol.* doi:10 . 1016 / j .  
474 pneurobio . 2014 . 12 . 002 (2015).
- 475 24. Urban-Ciecko, J., Fanselow, E. E. & Barth, A. L. Neocortical somatostatin neurons reversibly  
476 silence excitatory transmission via GABA<sub>B</sub> receptors. *Curr Biol* **25**, 722–31 (2015).
- 477 25. Fino, E. & Yuste, R. Dense inhibitory connectivity in neocortex. *Neuron* **69**, 1188–203 (2011).
- 478 26. Mante, V., Sussillo, D., Shenoy, K. V. & Newsome, W. T. Context-dependent computation by  
479 recurrent dynamics in prefrontal cortex. *Nature* **503**, 78–84 (2013).
- 480 27. Karnani, M. M., Agetsuma, M. & Yuste, R. A blanket of inhibition: functional inferences from  
481 dense inhibitory connectivity. *Curr Opin Neurobiol* **26**, 96–102 (2014).
- 482 28. Schiller, J, Major, G, Koester, H. J. & Schiller, Y. NMDA spikes in basal dendrites of cortical  
483 pyramidal neurons. *Nature* **404**, 285–9 (2000).

- 484 29. Jadi, M., Polsky, A., Schiller, J. & Mel, B. W. Location-dependent effects of inhibition on local  
485 spiking in pyramidal neuron dendrites. *PLoS Comput Biol* **8**, e1002550 (2012).
- 486 30. Silberberg, G. & Markram, H. Disynaptic inhibition between neocortical pyramidal cells  
487 mediated by Martinotti cells. *Neuron* **53**, 735–46 (2007).
- 488 31. Bayraktar, T, Welker, E, Freund, T. F., Zilles, K & Staiger, J. F. Neurons immunoreactive for va-  
489 soactive intestinal polypeptide in the rat primary somatosensory cortex: morphology and  
490 spatial relationship to barrel-related columns. *J Comp Neurol* **420**, 291–304 (2000).
- 491 32. Fu, Y., Kaneko, M., Tang, Y., Alvarez-Buylla, A. & Stryker, M. P. A cortical disinhibitory circuit  
492 for enhancing adult plasticity. *Elife* **4**, e05558 (2014).
- 493 33. Bar-Ilan, L., Gidon, A. & Segev, I. The role of dendritic inhibition in shaping the plasticity of  
494 excitatory synapses. *Front Neural Circuits* **6**, 118 (2012).
- 495 34. Graupner, M. & Brunel, N. Calcium-based plasticity model explains sensitivity of synaptic  
496 changes to spike pattern, rate, and dendritic location. *Proc Natl Acad Sci U S A* **109**, 3991–6  
497 (2012).
- 498 35. Nevian, T. & Sakmann, B. Spine Ca<sup>2+</sup> signaling in spike-timing-dependent plasticity. *J Neu-*  
499 *rosci* **26**, 11001–13 (2006).
- 500 36. Wong, K.-F. & Wang, X.-J. A recurrent network mechanism of time integration in perceptual  
501 decisions. *J Neurosci* **26**, 1314–28 (2006).
- 502 37. Lovett-Barron, M. *et al.* Regulation of neuronal input transformations by tunable dendritic  
503 inhibition. *Nat Neurosci* **15**, 423–30, S1–3 (2012).
- 504 38. Chen, S. X., Kim, A. N., Peters, A. J. & Komiyama, T. Subtype-specific plasticity of inhibitory  
505 circuits in motor cortex during motor learning. *Nat Neurosci*. doi:10.1038/nn.4049 (2015).
- 506 39. Koch, C, Poggio, T & Torre, V. Retinal ganglion cells: a functional interpretation of dendritic  
507 morphology. *Philos Trans R Soc Lond B Biol Sci* **298**, 227–63 (1982).
- 508 40. Kleindienst, T., Winnubst, J., Roth-Alpermann, C., Bonhoeffer, T. & Lohmann, C. Activity-  
509 dependent clustering of functional synaptic inputs on developing hippocampal dendrites.  
510 *Neuron* **72**, 1012–24 (2011).

- 511 41. Fu, M., Yu, X., Lu, J. & Zuo, Y. Repetitive motor learning induces coordinated formation of  
512 clustered dendritic spines in vivo. *Nature* **483**, 92–5 (2012).
- 513 42. Vogels, T. P., Sprekeler, H., Zenke, F., Clopath, C & Gerstner, W. Inhibitory plasticity balances  
514 excitation and inhibition in sensory pathways and memory networks. *Science* **334**, 1569–73  
515 (2011).
- 516 43. Xue, M., Atallah, B. V. & Scanziani, M. Equalizing excitation-inhibition ratios across visual  
517 cortical neurons. *Nature* **511**, 596–600 (2014).
- 518 44. Cichon, J. & Gan, W.-B. Branch-specific dendritic Ca(2+) spikes cause persistent synaptic  
519 plasticity. *Nature* **520**, 180–5 (2015).
- 520 45. Smith, S. L., Smith, I. T., Branco, T. & Häusser, M. Dendritic spikes enhance stimulus selec-  
521 tivity in cortical neurons in vivo. *Nature* **503**, 115–20 (2013).
- 522 46. Abbott, L. Where are the switches on this thing. *23 problems in systems neuroscience*, 423–31  
523 (2006).
- 524 47. Olshausen, B. A., Anderson, C. H. & Van Essen, D. C. A neurobiological model of visual at-  
525 tention and invariant pattern recognition based on dynamic routing of information. *J Neu-*  
526 *rosci* **13**, 4700–19 (1993).
- 527 48. Kepecs, A & Raghavachari, S. Gating information by two-state membrane potential fluctu-  
528 ations. *J Neurophysiol* **97**, 3015–23 (2007).
- 529 49. Zylberberg, A., Fernández Slezak, D., Roelfsema, P. R., Dehaene, S. & Sigman, M. The brain's  
530 router: a cortical network model of serial processing in the primate brain. *PLoS Comput*  
531 *Biol* **6**, e1000765 (2010).
- 532 50. O'Reilly, R. C. & Frank, M. J. Making working memory work: a computational model of  
533 learning in the prefrontal cortex and basal ganglia. *Neural Comput* **18**, 283–328 (2006).

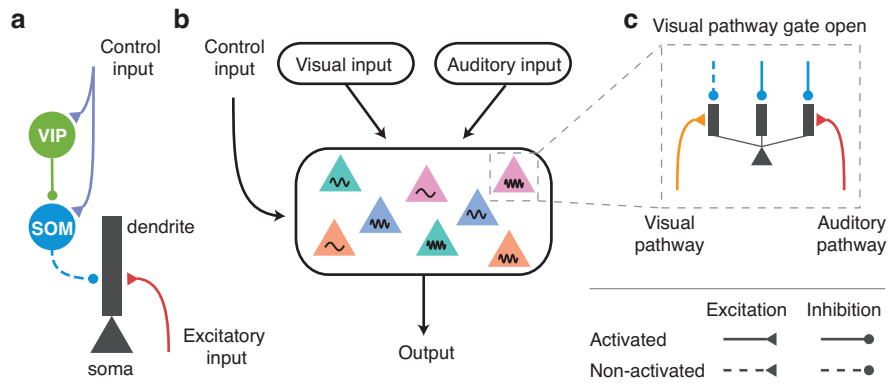

**Figure 1.** Dendritic disinhibitory circuit as a mechanism for pathway-specific gating. **(a)** Subcellular microcircuit motif for gating through dendritic disinhibition. Dendrites of pyramidal neurons are inhibited by SOM interneurons, which are themselves inhibited by VIP interneurons. A control input (representing a context or a task rule) targeting VIP interneurons (and potentially SOM neurons) can thereby disinhibit pyramidal neuron dendrites, opening the gate for excitatory inputs targeting these dendrites. **(b)** Circuit configuration for pathway-specific gating. Pyramidal neurons receive converging inputs from multiple pathways, e.g. visual and auditory. Single neurons in these areas are selective to multiple stimulus features, indicated here by color and frequency. The processing of each pathway is regulated by the control input. **(c)** Inputs from different pathways target distinct subsets of dendrites of these pyramidal neurons. A pathway can be gated-on by specifically disinhibiting the dendrites that it targets, corresponding to an alignment between excitation and disinhibition. Disinhibition is represented by dashed lines.

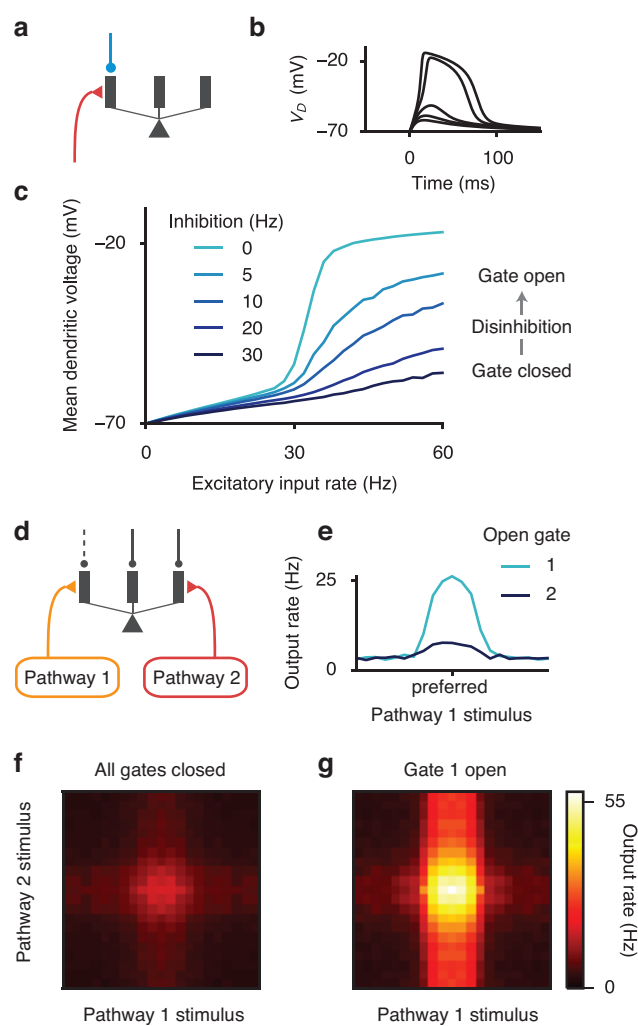

**Figure 2.** [Caption on next page]

**Figure 2.** Context-dependent gating of specific pathways. **(a)** A reduced compartmental neuron with a somatic compartment connected to multiple, otherwise independent, dendritic compartments (only three shown). **(b)** Excitatory inputs can generate a local, regenerative NMDA plateau potential in the dendrite. As number of activated synapses increased, there is a sharp nonlinear increase in the evoked dendritic membrane depolarization ( $V_D$ ). **(c)** Disinhibition of the targeted branch opens the gate for the excitatory input.

**(d)** A pyramidal neuron receives converging inputs from multiple pathways carrying different stimulus features, giving it selectivity to a preferred stimulus for each feature dimension. Each input pathway targets separate dendrites, which are disinhibited correspondingly in each context by top-down control inputs (not modeled here). **(e)** Tuning curve for input pathway 1, when only this pathway is activated. The input pathway encodes a stimulus feature, e.g. motion direction, with a bell-shaped tuning curve for the input. The preferred feature value corresponds to higher input firing rate. When gate 1 is open by disinhibiting the dendrites targeted by input pathway 1, the neuron exhibits strong tuning (light blue). When gate 2 is instead open, the neuron exhibits weak tuning for the feature (dark blue). The amount of inhibition reduced for a disinhibited dendrite, i.e. the disinhibition level, is 30 Hz.

**(f,g)** Two dimensional tuning curves when both pathways are activated. **(f)** In the default context, no dendrites are disinhibited and both pathways are gated off. The neuron exhibits weak responses regardless of the stimulus features. **(g)** When gate 1 is open by disinhibiting branches targeted by pathway 1, the response of this neuron is dominated by tuning to the pathway 1 stimulus, although pathway 2 has a residual impact.

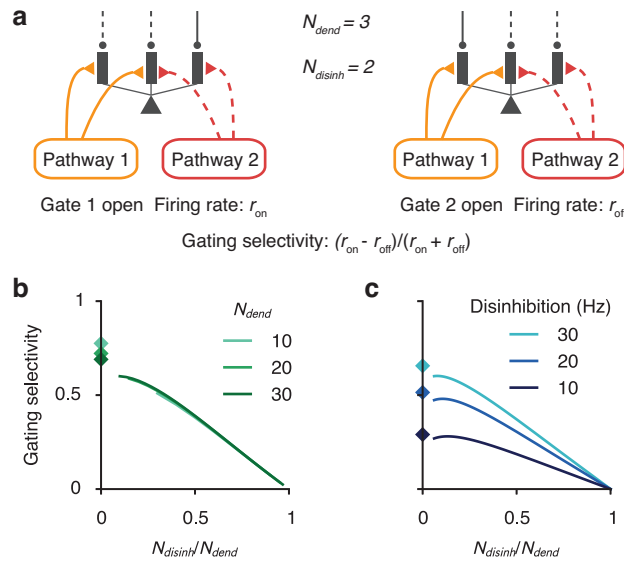

**Figure 3.** Characterization of gating selectivity in pyramidal neurons.

(a) Schematic of gating, presenting pathway 1 input when gate 1 is opened (left) or gate 2 is opened (right). There are  $N_{dend}$  available dendrites in total. Each input pathway targets  $N_{disinh}$  dendrites. To gate a pathway on, these exact  $N_{disinh}$  dendrites are disinhibited, creating an aligned pattern of disinhibition. Each pathway selects dendrites randomly and independently from other pathways, which can result in overlap of the excitation-disinhibition patterns across pathways. When  $N_{disinh}$  is large, projections from different pathways are more likely to overlap. The neuron's firing rate is  $r_{on}$  and  $r_{off}$  in response to the preferred stimulus of the gated-on (left) and gated-off (right) pathway respectively. The gating selectivity is defined as  $(r_{on} - r_{off}) / (r_{on} + r_{off})$ , which is 1 for perfect gating and 0 for no gating.

(c) Gating selectivity increases as excitation/disinhibition patterns become sparser, i.e. with a smaller proportion of targeted and disinhibited dendrites for a pathway ( $N_{disinh} / N_{dend}$ ). Diamonds mark the case of non-overlapping excitatory projections, corresponding to the limit of maximal sparseness. (d) Gating selectivity is higher with stronger disinhibition, for all sparseness levels.



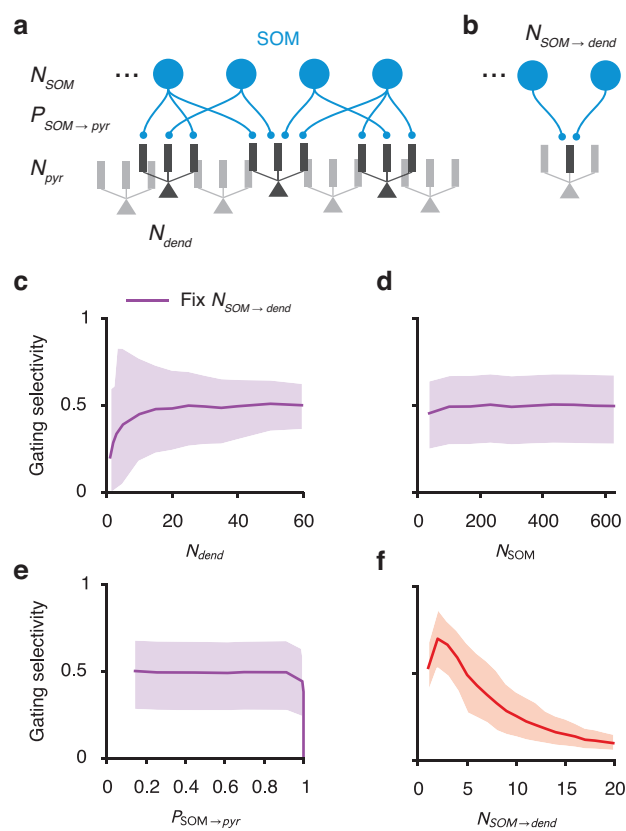

Figure 4. (caption on next page)

**Figure 4.** Gating selectivity as functions of SOM-pyramidal circuit parameters

**(a)** A biologically-constrained model for a cortical column of SOM and pyramidal neurons. We only modeled the SOM-to-pyramidal connections. The model is subject to experimentally-measured constraints of the following parameters: number of SOM neurons ( $N_{\text{SOM}}$ ), connection probability from SOM to pyramidal neurons ( $P_{\text{SOM} \rightarrow \text{pyr}}$ ), and the number of dendrites on each pyramidal neuron ( $N_{\text{dend}}$ ). We consider the “worst case” scenario that the SOM-to-dendrite connections are random. Finally we assume for now that control input for each pathway suppresses a random subset of SOM neurons. The different contrasts used are for illustration purpose only.

**(b)** A critical parameter for the SOM-to-pyramidal circuit is the number of SOM neurons targeting each dendrite ( $N_{\text{SOM} \rightarrow \text{dend}}$ ). This parameter can be calculated using other experimentally-measured parameters under the assumption of random connectivity,  $N_{\text{SOM} \rightarrow \text{dend}} = N_{\text{SOM}} \cdot [1 - (1 - P_{\text{SOM} \rightarrow \text{pyr}})^{1/N_{\text{dend}}}]$ .

**(c-e)** Gating selectivity only weakly depends on  $N_{\text{dend}}$  **(c)**,  $N_{\text{SOM}}$  **(d)**, and  $P_{\text{SOM} \rightarrow \text{pyr}}$  **(e)** if  $N_{\text{SOM} \rightarrow \text{dend}}$  is kept constant by co-varying another parameter. The plotted curve marks the mean and the shaded region marks the bottom 10% to top 10% of the neuronal population.

**(f)** Gating selectivity is high when each dendrite is targeted by a few SOM neurons. Given experimental measurements of  $P_{\text{SOM} \rightarrow \text{pyr}} \approx 0.6$ ,  $N_{\text{dend}} \approx 30$ ,  $N_{\text{SOM}} \approx 160$ , we obtained  $N_{\text{SOM} \rightarrow \text{dend}} \approx 5$ , leading to relatively high gating selectivity  $\sim 0.5$ . Total strength of inhibition onto each pyramidal dendrite is always kept constant when varying parameters.

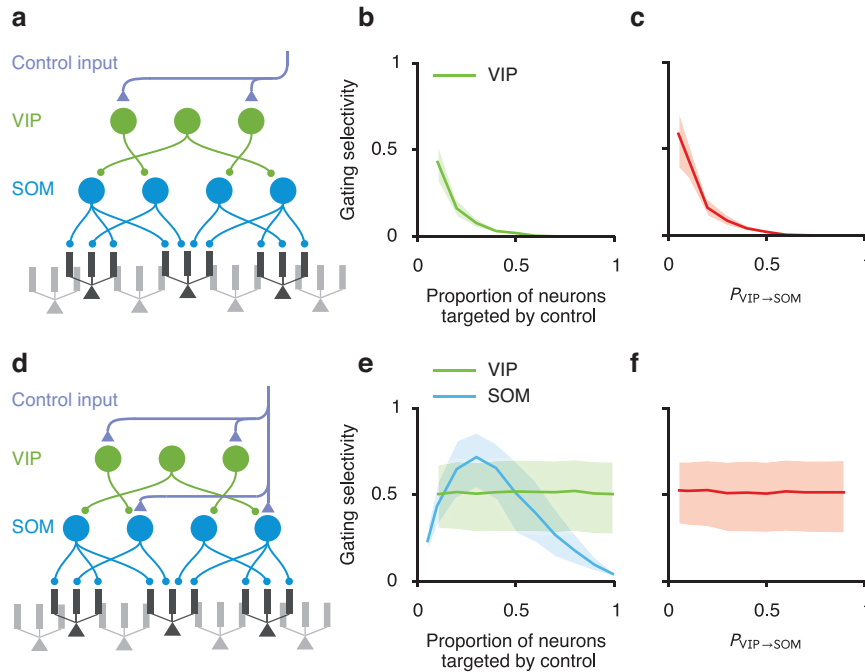

**Figure 5.** Two possible schemes of control for the interneuronal circuit.

We built a simplified circuit model containing VIP, SOM, and pyramidal neurons. **(a-c)** Control signals target only VIP neurons. **(a)** In this scheme, for each pathway, control inputs target a random subset of VIP neurons. And the connection probability from VIP to SOM neurons is  $P_{VIP \rightarrow SOM}$ . **(b,c)** Good gating selectivity is only achieved when a small subset of VIP neurons is targeted by control inputs **(b)**, and when the VIP-SOM connections is sparse **(c)**.

**(d-f)** Control signals target both VIP and SOM neurons. **(d)** In this scheme, we assume that for each pathway control inputs target a random subset of VIP and SOM neurons. **(e)** Gating selectivity depends on the proportion of SOM (blue) but not VIP (green) neurons targeted by control input. **(f)** Gating selectivity does not depend on  $P_{VIP \rightarrow SOM}$ . Curves and shaded regions are as in **Fig. 4**.

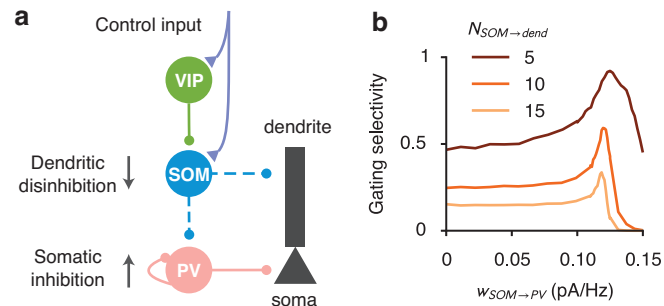

**Figure 6.** Somatic inhibition improves gating selectivity.

(a) PV neurons project to the somatic areas of pyramidal neurons, and are inhibited by SOM neurons and themselves. Suppression of SOM neurons cause disinhibition of PV neurons, therefore an increase in somatic inhibition onto pyramidal neurons.

(b) A moderate increase in somatic inhibition always improves gating selectivity. We included PV neurons and their corresponding connections in the model of **Fig. 5d**. Gating selectivity increases as a function of the SOM-to-PV connection weights ( $w_{SOM \rightarrow PV}$ ) in a wide range (see Supplementary Mathematical Appendix for a proof). However, when gating selectivity is low without PV neurons (light curve), the peak of this increase is lower and the slope is sharper. Gating selectivity starts to decrease when the SOM-to-PV connection, therefore the somatic inhibition, is too strong that the responses of many pyramidal neurons are completely suppressed.

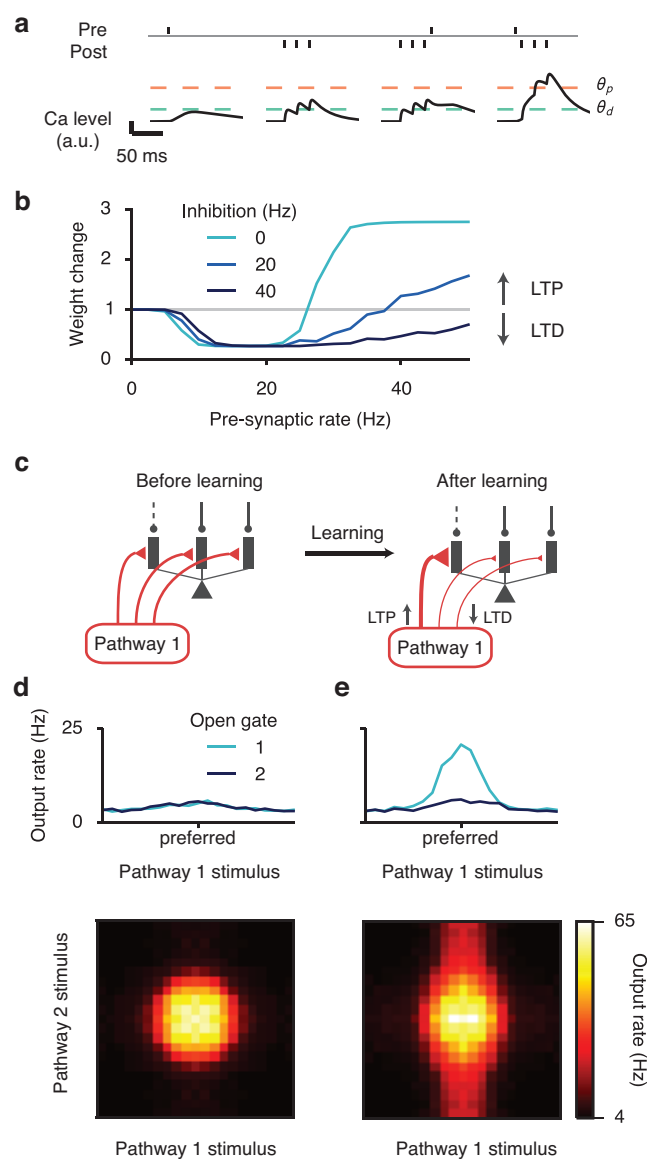

**Figure 7.** [Caption on next page]

**Figure 7.** Learning to gate specific pathways.

(a) Model schematic. Pre- and post-synaptic spikes both induce calcium influx. The overall synaptic weight change is determined by the amount of time the calcium level spends above thresholds for depression ( $\theta_d$ ) and potentiation ( $\theta_p$ )<sup>34</sup>. The model is fitted to experimental data, and is able to quantitatively predict results not used in the fitting (**Supplementary Fig. 7**).

(b) Dendritic inhibition makes potentiation harder to induce. With background-level inhibition (light blue), synaptic weight change shows three regimes as a function of excitatory input rate: no change for low rate, depression for medium rate, and potentiation for high rate. With a medium level of inhibition (dark blue), potentiation requires a higher excitatory input rate. With relatively strong inhibition (black), potentiation becomes impossible within a reasonable range of excitatory input rates. The post-synaptic rate is fixed at 10 Hz.

(c) Learning paradigm. (Left) Excitatory synapses from each pathway are initialized uniformly across dendrites. When pathway 1 is activated, specific branches of the neuron are disinhibited (dashed line), i.e. gate 1 is open. During learning, only one pathway is activated at a time. (Right) After learning, activated excitatory synapses onto the disinhibited branches are strengthened, while activated synapses onto inhibited branches are weakened, resulting in an alignment of excitation and disinhibition patterns. Synaptic weights of non-activated synapses remain unchanged (not shown).

(d) Response properties of the neuron before learning. (Top) Tuning curve of the neuron when only pathway 1 is presented. The neuron shows no preference to the gate opened prior to learning. (Bottom) Two-dimensional tuning curve of the neuron when both pathways are simultaneously presented and gate 1 is open. See **Fig. 2** for the definition of the tuning curves. (e) Response properties of the neuron after learning. (Top) The neuron shows strong tuning to pathway 1 input when gate 1 is open. (Bottom) When both pathways are presented, the neuron's response is primarily driven by pathway 1 stimulus, although pathway 2 stimulus also affects the neuron's firing.

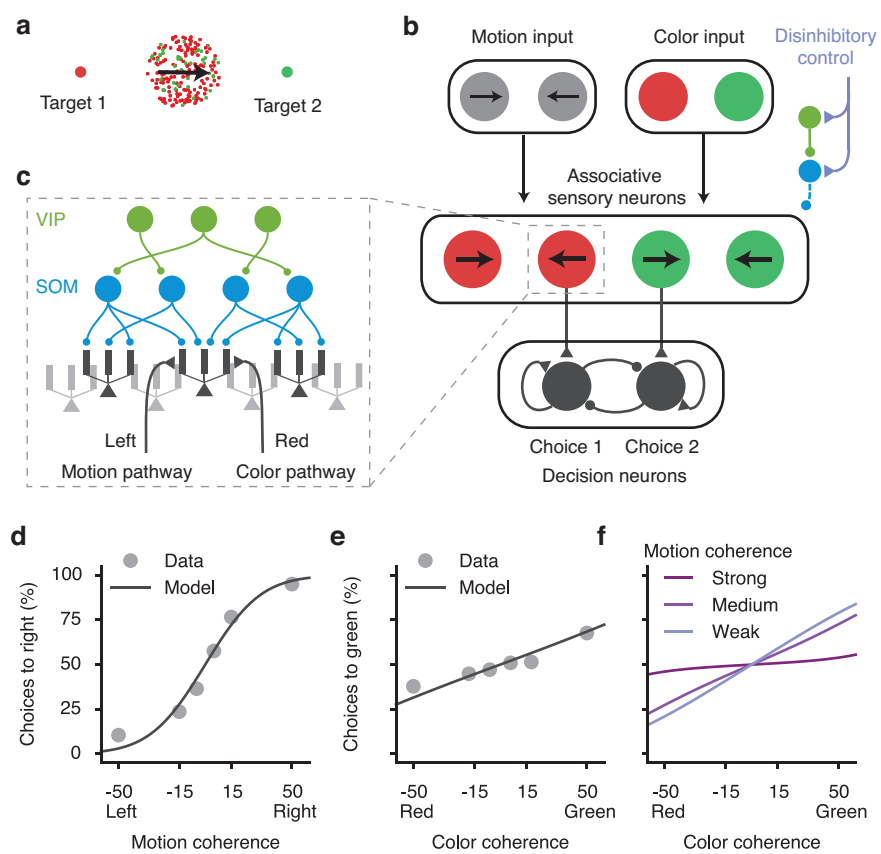

**Figure 8.** [Caption on next page]

**Figure 8.** Pathway-specific gating in an example context-dependent decision-making task.

(a) A flexible decision-making task. Depending on the context, subject's behavioral response should be based on either the color or the motion direction of the stimulus.

(b) The circuit model scheme. Motion and color pathways target associative-sensory neurons, which are subject to context-dependent disinhibitory control. Neurons preferring color and motion evidence for the same target project to the corresponding neural pool in the decision-making circuit.

(c) Associative-sensory neurons receive converging inputs from both motion and color pathways, and are controlled by the dendrite-targeting interneuronal circuit.

(d-f) Fit and prediction of behavioral performance. Behavioral performance in the motion context as a function of motion coherence (d) and color coherence (e) for a monkey (dots), and the model's fit (line). Experimental data are extracted from [26]. The model can capture the behavioral performance of a monkey. (f) In the model, impact of the irrelevant pathway (color) is strongest when the relevant pathway signal is weak (with low motion coherence).



## 534 **Online Methods**

535 A summary of all types of models used and where they are used can be found in **Supplementary**  
536 **Table 2.**

### 537 **Spiking pyramidal neuron models**

538 For the fully reconstructed multi-compartmental pyramidal neuron model (**Supplementary Fig.**  
539 **1a-d**), we adapted a previously developed model based on a layer 2/3 pyramidal neuron in the rat  
540 somatosensory cortex reported by [51]. We used the passive membrane parameter set; results are  
541 essentially the same with the active membrane parameter set. Simulations were implemented  
542 with the NEURON simulator<sup>52</sup>.

543 The reduced multi-compartmental spiking neuron model is comprised of multiple dendritic  
544 compartments and one somatic compartment. All dendritic compartments are equivalent, not  
545 directly coupled to each other, and coupled to the soma. There are 10 dendritic compartments  
546 for all simulations using this model (**Fig. 2,7**). The number of dendrites does not change the  
547 results as long as we normalize the dendrite-soma coupling strength with respect to the number  
548 of dendrites. The soma is modeled as a leaky-integrate-and-fire compartment with dynamics  
549 following:

$$C_S \frac{dV_S}{dt} = -g_{L,S}(V_S - E_L) - \sum_i g_c(V_S - V_{i,D}) + I_{\text{syn},S} \quad (4)$$

550 where the subscripts  $S$  and  $D$  correspond to soma and dendrites, respectively.  $V_{i,D}$  is the mem-  
551 brane potential of the  $i$ -th dendrite.  $C_S$  is the membrane capacitance,  $E_L$  is the resting potential,  
552  $g_L$  is the leak conductance,  $g_c$  is the coupling between each dendritic compartment and the so-  
553 matic compartment. We set  $C_S = 50.0$  pF and  $g_{L,S} = 2.5$  nS, producing a 20-ms membrane time  
554 constant for soma. We also set  $E_L = -70$  mV and  $g_c = 4.0$  nS. The somatic spiking mechanism is  
555 integrate-and-fire, with spike threshold  $-50$  mV, reset potential  $-55$  mV, and refractory period 2  
556 ms. The dynamics of the dendritic membrane potential ( $V_D$ ) follows

$$C_D \frac{dV_D}{dt} = -g_{L,D}(V_D - E_L) - g_c(V_D - \hat{V}_S) + I_{\text{syn},D} \quad (5)$$

557 where  $\hat{V}_S$  is the somatic shadow potential<sup>53</sup>, which follows the same equation as  $V_S$ , except with  
558 no spiking and resetting. We set  $C_D = 20.0$  pF and  $g_{L,D} = 4.0$  nS, producing a 5-ms membrane

559 time constant<sup>54</sup>. After a somatic spike, the back-propagating action potential is modeled as an  
 560 3-ms-delayed voltage increase of 10 mV in all dendrites<sup>55</sup>.

561 The main free parameters of the reduced-compartmental model,  $g_c$  and  $g_{L,D}$ , were chosen to  
 562 match *in vitro* properties reported by [54]. Specifically, a single-synapse dendritic EPSP of 1-mV  
 563 peak is attenuated to about 0.05 mV in the soma, and a dendritic NMDA plateau potential evokes  
 564 a somatic depolarization with the peak around 10 mV. We also made several efforts to adapt  
 565 our model to mimic physiological *in vivo* conditions, including excitation-inhibition balanced  
 566 background inputs and reduced soma-dendrite coupling. We used an *in-vivo* set of parameters  
 567 whenever appropriate (**Fig. 2d-g** and **Fig. 7c,d**). The soma-dendrite coupling is reduced five-  
 568 fold to  $g_{c,vivo} = 0.8$  nS, to achieve the stronger signal attenuation observed in high-conductance  
 569 state<sup>56</sup>. In this regime, the soma also receives excitatory and inhibitory background inputs, 500  
 570 Hz of 2.5-nS AMPAR input and 150 Hz of 4.0-nS GABAR input, to approximate the excitation-  
 571 inhibition balanced background input that gives the neuron a baseline Poisson-like firing rate  
 572 around 3 Hz. Reduced spiking neuron simulations were implemented with the BRIAN neural  
 573 simulator<sup>57</sup>. All simulation codes are available on ModelDB.

574 We used four types of synapses, AMPAR, NMDAR, GABA<sub>A</sub>R, and GABA<sub>B</sub>R. Since GABA<sub>B</sub>Rs  
 575 are only used briefly in (**Supplementary Fig. 3**), we denote GABA<sub>A</sub> simply as GABA. AMPAR and  
 576 GABAR synapses are modeled as linear:

$$I_{\text{syn}} = -\tilde{g}_{\text{syn}} s_{\text{syn}} (V - E_{\text{syn}}) \quad (6)$$

$$\frac{ds_{\text{syn}}}{dt} = -\frac{s_{\text{syn}}}{\tau_{\text{syn}}} + \sum_i \delta(t - t_i) \quad (7)$$

577 where  $s_{\text{syn}}$  is the gating variable representing the proportion of open channels,  $\tilde{g}_{\text{syn}}$  is the max-  
 578 imum synaptic conductance,  $E_{\text{syn}}$  is the synaptic reversal potential,  $\tau_{\text{syn}}$  is the synaptic time  
 579 constant, and  $t_i$  are pre-synaptic spike times. We set  $\tau_{\text{AMPA}} = 2$  ms,  $E_{\text{AMPA}} = E_E = 0$  mV,  $E_{\text{GABA}} =$   
 580  $E_I = -70$  mV, and  $\tilde{g}_{\text{GABA}} = 4.0$  nS. For dendrite-targeting inhibitory synapses  $\tau_{\text{GABA,dend}} = 20$  ms,  
 581 whereas  $\tau_{\text{GABA,soma}} = 10$  ms for soma-targeting inhibitory synapses. These are based on the ob-  
 582 servations that dendrite-targeting inhibition tend to be slower<sup>58,59</sup>. In **Supplementary Fig. 1d,h**,  
 583  $\tilde{g}_{\text{AMPA}} = 2.5$  nS. In **Supplementary Fig. 3**,  $\tilde{g}_{\text{AMPA}}$  ranges from 0 to 2.5 nS. Otherwise  $\tilde{g}_{\text{AMPA}}$  is set  
 584 as 0 nS (no AMPAR input).

585 GABA<sub>B</sub>R synapses are post-synaptic. Each spike at time  $t_i$  increases the gating variable  $s_{\text{GABA}_B}(t)$

586 by  $\gamma_{\text{GABA}_B} [\exp[(t - t_i)/\tau_{\text{GABA}_B, \text{decay}}] - \exp[(t - t_i)/\tau_{\text{GABA}_B, \text{rise}}]]$ , where  $\gamma_{\text{GABA}_B}$  is a normalizing fac-  
 587 tor such that the peak of the above expression is 1. Then the total input current voltage depen-  
 588 dent is

$$I_{\text{GABA}_B} = -\tilde{g}_{\text{GABA}_B} s_{\text{GABA}_B} f_{\text{GABA}_B}(V) \quad (8)$$

589 where  $f_{\text{GABA}_B}(V) = 33.33\text{mV} \cdot (0.5 - 2/(1 + \exp((V + 98.73)/12.5)))$ , as obtained from [60].

590 NMDAR synapses include a voltage-dependent magnesium block  $f_{\text{Mg}}(V)$  and saturating gat-  
 591 ing variable  $s_{\text{NMDA}}$ :

$$I_{\text{NMDA}} = -\tilde{g}_{\text{NMDA}} s_{\text{NMDA}} (V - E_E) f_{\text{Mg}}(V) \quad (9)$$

$$f_{\text{Mg}}(V) = \left[ 1 + \exp\left(-\frac{V - V_{\text{half}}}{V_{\text{width}}}\right) \right]^{-1} \quad (10)$$

592 with  $V_{\text{half}} = -19.9$  mV and  $V_{\text{width}} = 12.48$  mV<sup>61</sup>. The NMDA conductance  $\tilde{g}_{\text{NMDA}} = 2.5$  nS. The  
 593 NMDAR gating variable dynamics follow:

$$\frac{ds_{\text{NMDA}}}{dt} = -\frac{s_{\text{NMDA}}}{\tau_{\text{NMDA}, \text{decay}}} + \alpha_{\text{NMDA}} x_{\text{NMDA}}(t)(1 - s_{\text{NMDA}}) \quad (11)$$

$$\frac{dx_{\text{NMDA}}}{dt} = -\frac{x_{\text{NMDA}}}{\tau_{\text{NMDA}, \text{rise}}} + \sum_i \delta(t - t_i) \quad (12)$$

594 with  $\tau_{\text{NMDA}, \text{decay}} = 100$  ms,  $\tau_{\text{NMDA}, \text{rise}} = 2$  ms, and  $\alpha_{\text{NMDA}} = 0.3$  ms<sup>-1</sup>. This choice of  $\alpha_{\text{NMDA}}$  sets  
 595  $s_{\text{NMDA}}$  to be roughly 0.4 at its peak after a single spike<sup>62,63</sup>. With this value of  $\alpha_{\text{NMDA}}$ , the satura-  
 596 tion of NMDA starts to get prominent around firing rate  $r = 1/(\alpha_{\text{NMDA}} \tau_{\text{NMDA}, \text{rise}} \tau_{\text{NMDA}, \text{decay}}) \approx 16$   
 597 Hz. By default in simulations with the reduced spiking model, the excitatory inputs are 15 inde-  
 598 pendent NMDAR synapses with the same rate. Fewer number of excitatory synapses can become  
 599 insufficient to elicit NMDA plateau potential. Since GABA<sub>A</sub> and AMPAR synapses are linear, their  
 600 inputs are directly represented by the overall rates.

601 Each excitatory synapse also has a calcium concentration level with arbitrary unit, which  
 602 consists of two components, one NMDAR-dependent and one voltage-gated calcium-channel  
 603 (VGCC) dependent:  $[\text{Ca}^{2+}] = [\text{Ca}^{2+}]_{\text{NMDA}} + [\text{Ca}^{2+}]_{\text{VGCC}}$ . The NMDAR-dependent component is  
 604 modeled as leaky integration of the NMDAR current:

$$\tau_{\text{Ca}, \text{decay}} \frac{d[\text{Ca}^{2+}]_{\text{NMDA}}}{dt} = -[\text{Ca}^{2+}]_{\text{NMDA}} + \kappa_{\text{NMDA}} I_{\text{NMDA}} \quad (13)$$

605 where  $\kappa_{\text{NMDA}}$  is a scaling parameter with unit  $\text{pA}^{-1}$ . The VGCC component is evoked by post-  
 606 synaptic spikes that back-propagate into dendrites. Each spike induces a bi-exponential in-  
 607 crease:

$$[\text{Ca}^{2+}]_{\text{VGCC}}(t) = \kappa_{\text{VGCC}} \gamma_{\text{Ca}} \sum_i \left[ \exp\left(-\frac{t-t_i}{\tau_{\text{Ca,decay}}}\right) - \exp\left(-\frac{t-t_i}{\tau_{\text{Ca,rise}}}\right) \right] \quad (14)$$

608 Here  $\gamma_{\text{Ca}}$  is a normalizing constant so that the peak response to one spike is  $\kappa_{\text{VGCC}}$ . And  $\kappa_{\text{VGCC}}$  is  
 609 again a scaling parameter.  $\tau_{\text{Ca,decay}} = 30$  ms is estimated from [35].  $\tau_{\text{Ca,rise}} = 2$  ms is used mainly  
 610 to make  $[\text{Ca}^{2+}]$  continuous.

### 611 NMDA plateau potential

612 The voltage of a dendrite receiving NMDAR and GABAR inputs follows

$$C_D \frac{dV_D}{dt} = -g_{L,D}(V_D - E_L) - g_c(V_D - \hat{V}_S) - \sum_j \tilde{g}_{\text{NMDA}} s_{\text{NMDA},j}(t)(V_D - E_E) f_{\text{Mg}}(V_D) - \sum_k \tilde{g}_{\text{GABA}} s_{\text{GABA},k}(t)(V_D - E_I)$$

613 where  $j$  and  $k$  are indices of NMDAR and GABAR synapses respectively. Denote

$$g_{\text{NMDA}}(t) = \sum_j \tilde{g}_{\text{NMDA}} s_{\text{NMDA},j}(t) \quad (15)$$

614 as the total NMDA input conductance onto this dendrite. The maximum value of  $g_{\text{NMDA}}(t)$  is  
 615 simply  $g_{\text{NMDA,max}} = \sum_j \tilde{g}_{\text{NMDA}} = N_{\text{NMDA}} \tilde{g}_{\text{NMDA}}$ , where  $N_{\text{NMDA}}$  is the number of NMDAR synapses.  
 616 Similarly

$$g_{\text{GABA}}(t) = \sum_k \tilde{g}_{\text{GABA}} s_{\text{GABA},k}(t) \quad (16)$$

617 If we ignore the coupling between this dendrite and its soma for now, and consider constant  
 618 synaptic conductances  $g_{\text{NMDA}} = g_{\text{NMDA}}(t)$ ,  $g_{\text{GABA}} = g_{\text{GABA}}(t)$ . Then we have

$$C_D \frac{dV_D}{dt} = -g_{L,D}(V_D - E_L) - g_{\text{NMDA}}(V_D - E_E) f_{\text{Mg}}(V_D) - g_{\text{GABA}}(V_D - E_I) \quad (17)$$

619 Since we have  $E_I = E_L$ , the steady-state dendritic voltage  $V_{D,ss}$  satisfies

$$0 = -(V_{D,ss} - E_L) - \frac{g_{\text{NMDA}}}{g_{L,D} + g_{\text{GABA}}}(V_{D,ss} - E_E) f_{\text{Mg}}(V_D) \quad (18)$$

620 This equation can be solved numerically, resulting in the curve in **Supplementary Fig. 2d**.

## 621 Pathway-specific gating in single pyramidal neuron

622 Gating is performed by disinhibiting a specific subset of dendrites. Disinhibited dendrites always  
623 receive 5 Hz background inhibition. The disinhibition level is defined as the difference between  
624 the rates of inhibition received by inhibited and disinhibited dendrites.

625 In **Fig. 2d-g**, each pathway targets two dendrites with 15 NMDAR synapses on each den-  
626 drite. The dendrites targeted by each pathway do not overlap. For each pathway, the input rate  
627 ( $u_E$ ) follows a bell-shaped tuning to the stimulus value ( $z$ ):  $u_E = 40 \exp(-z^2)$  Hz, where  $z$  ranges  
628 between  $-2.4$  and  $2.4$ . The disinhibition level is 30 Hz (from 35 Hz to 5 Hz).

629 Presented alone, the preferred stimulus ( $z = 0$ ) from one pathway increases the output firing  
630 rate by  $r_{\text{on}}$  ( $r_{\text{off}}$ ) when the pathway is gated on (off). The gating selectivity is defined as

$$\frac{r_{\text{on}} - r_{\text{off}}}{r_{\text{on}} + r_{\text{off}}}, \quad (19)$$

631 For **Fig. 3**, excitatory pathways can overlap. In the context with gate 1 open,  $N_{\text{disinh}}$  dendrites  
632 are disinhibited. Excitatory pathway 1 targets these  $N_{\text{disinh}}$  dendrites, each with strength 25 nS,  
633 and similarly for gate 2 and pathway 2. The  $N_{\text{disinh}}$  dendrites disinhibited for gate 2 are chosen  
634 randomly and independently from the  $N_{\text{disinh}}$  dendrites disinhibited for gate 1. For each  $N_{\text{disinh}}$   
635 and  $N_{\text{dend}}$ ,  $r_{\text{on}}$ ,  $r_{\text{off}}$  are averaged across all possible projection patterns.

## 636 Rate pyramidal neuron model

637 The rate model is fitted with simulation data from the spiking model with *in-vivo* parameters  
638 (**Supplementary Fig. 4**). The time-averaged voltage of a dendritic compartment ( $\bar{V}_D$ ) is mod-  
639 eled as a sigmoidal function of total excitatory input conductance ( $\bar{g}_E$ , see below for definition)  
640 following:

$$\bar{V}_D = f_V(\bar{g}_E, \bar{g}_I) = 30 \cdot \left[ 1 + \tanh\left(\frac{\bar{g}_E - g_{1/2}}{\beta}\right) \right] + V_0 + E_L \quad (20)$$

641 The mid-point  $g_{1/2}$  is proportional to the total inhibitory conductance  $\bar{g}_I$  plus the leak conduc-  
642 tance of the dendrite  $g_{L,D}$ , as expected from the constant conductance scenario (**Supplementary**  
643 **Fig. 2c**)

$$g_{1/2} = b_g \cdot (g_{L,D} + \bar{g}_I) \quad (21)$$

644 Based on our observation of the reduced spiking model, we modeled the width  $\beta$  as an exponen-  
 645 tially increasing function of inhibition:

$$\beta = k \cdot \exp(\bar{g}_I / \gamma) \quad (22)$$

646 This increase of width  $\beta$  as a function of  $\bar{g}_I$  captures the linearization effect of sparse inhibi-  
 647 tion on the voltage-input function (**Fig. 2c**). Fit values of the parameters are  $b_g = 5.56$ ,  $k = 9.64$   
 648 nS,  $\gamma = 6.54$  nS,  $V_0 = 0.78$  mV. The model is fitted to a simulated 10-dendrite spiking neuron  
 649 model. When simulating dendrites of the spiking model, somatic shadow voltage is clamped at  
 650 -60 mV, and back-propagating action potential is fixed as a Poisson spike train of 10 Hz. This phe-  
 651 nomenological model allows us to interpolate the dendritic voltage for a large range of excitatory  
 652 and inhibitory inputs very rapidly.

653 The firing rate of the soma is modeled as a power law function of input current  $I$ :

$$r = f_r(I) = [\max(0, I + 174.86) / 45.16]^{2.89} \quad (23)$$

654 Here  $I$  is the sum of the input current from dendrites and also the somatic inhibition from PV  
 655 neurons whenever applicable. The parameters are fitted from simulation of the reduced spiking  
 656 model. We assume the somatic voltage fluctuates around  $E_{\text{reset}}$ , and denote the mean dendritic  
 657 voltage  $\langle V_D \rangle$ . Then the input current from dendrites is  $I_{\text{dend} \rightarrow \text{soma}} = G_c \cdot (\langle V_D \rangle - E_{\text{reset}})$ , where  
 658  $G_c$  is the total dendrite-soma coupling of all dendrites.  $G_c = 8$  nS. Since we assume  $G_c$  is fixed  
 659 whenever we vary the number of dendrites (**Fig. 3,4**), the somatic function does not depend on  
 660 the number of dendrites and need not be re-parametrized. So  $I = I_{\text{dend} \rightarrow \text{soma}} + \Delta I_{\text{PV} \rightarrow \text{soma}}$ , where  
 661  $\Delta I_{\text{PV} \rightarrow \text{soma}}$  is the change in somatic inhibition from PV neurons.

662 For inputs to the rate model,  $\bar{g}_E$  and  $\bar{g}_I$  are the time-averaged total conductance of all excita-  
 663 tory and inhibitory synapses, respectively. For NMDAR-only excitatory input, the approximated  
 664 time-averaged gating variable  $\bar{s}_{\text{NMDA}}$  of a single synapse receiving input rate  $r_E$  follows,

$$\bar{s}_{\text{NMDA}} = 1 - (1 + r_E \tau_{\text{NMDA, rise}} \tau_{\text{NMDA, decay}} \alpha_{\text{NMDA}})^{-1} \quad (24)$$

665 For  $N_{\text{NMDA}}$  synapses each with maximal conductance  $\tilde{g}_{\text{NMDA}}$ , the total excitatory conductance  
 666 is

$$\bar{g}_E = N_{\text{NMDA}} \bar{s}_{\text{NMDA}} \tilde{g}_{\text{NMDA}} \quad (25)$$

667 Therefore,  $\bar{g}_E$  saturates as  $\bar{s}_{\text{NMDA}}$  does. Because the GABAR conductance is linear in its input  
668 rate, the total inhibitory conductance is

$$\bar{g}_I = r_I \tau_{\text{GABA}} \bar{g}_{\text{GABA}} \quad (26)$$

669 where  $r_I$  is the overall inhibitory input rate onto that dendrite.

## 670 **Interneuron Models**

671 SOM neurons are modeled as simple rate neurons with a rectified linear f-I curve. The firing rate  
672 of a SOM neuron is

$$r_{\text{SOM}} = \max(0, \beta_{\text{SOM}}(I_{\text{syn,SOM}} - I_{\text{th,SOM}})) \quad (27)$$

673 where  $\max(x, 0)$  is a rectified linear function of  $x$ .  $I_{\text{th,SOM}} = 40$  pA is the rheobase, i.e. the min-  
674 imum current required to activate the neuron, and  $\beta_{\text{SOM}} = 90$  Hz/nA is the f-I curve slope for  
675 SOM neurons, which we matched to data from [64]. SOM neurons typically display adapting  
676 responses to constant input, and the synapses of SOM neurons show short-term-plasticity. We  
677 ignored these aspects of temporal dynamics because here we are interested in the steady-state  
678 response. SOM neurons receive 150 pA input current in the default state, leading to a baseline  
679 firing of SOM neurons around 10 Hz as observed experimentally<sup>5,13</sup>.

680 For VIP neurons, we assume that the control input targets  $N_{\text{control,VIP}} = \text{round}(N_{\text{VIP}} \cdot P_{\text{control,VIP}})$   
681 of them. On average VIP neurons are assumed to fire at  $\bar{r}_{\text{VIP}} = 5$  Hz. Therefore the VIP neurons  
682 non-activated by the control input fire at 0 Hz, while those targeted by the control input fire at  
683  $(5 \cdot N_{\text{VIP}} / N_{\text{control,VIP}})$  Hz.

684 PV neurons are modeled simply as linear rate neurons with a f-I curve slope of  $\beta_{\text{PV}} = 220$   
685 Hz/nA, because their activities never reach zero in our model. Since we are only interested in  
686 their change of activities in response to SOM neuron suppression, the spontaneous activity of  
687 PV neurons is irrelevant to our model.

## 688 **Interneuronal Network**

689 The full interneuronal network model contains pyramidal, SOM, VIP, and PV neurons. The net-  
690 work model is roughly based on a L2/3 cortical column microcircuit, and contains 3000 pyrami-  
691 dal neurons, 160 SOM neurons, 140 VIP neurons, and 200 PV neurons<sup>65</sup>. However, the analysis

692 applies more generally. Pyramidal neurons are modeled as multi-compartmental rate neurons  
693 as described above. We typically used  $N_{\text{dend}} = 30$  dendrites, approximately corresponding to  
694 pyramidal neurons in associative areas<sup>66</sup>. The number of pyramidal neurons does not affect our  
695 results.

696 The SOM-to-dendrite connections are set randomly. Instead of drawing each connection  
697 randomly and independently with a fixed probability, we assume that each dendrite is targeted  
698 by precisely  $N_{\text{SOM} \rightarrow \text{dend}}$  SOM neurons, when  $N_{\text{SOM} \rightarrow \text{dend}}$  is an integer, so that each dendrite  
699 receives the same amount of net inhibition in the default state. The identities of SOM neu-  
700 rons targeting each dendrite is randomly chosen. The total inhibitory conductance received  
701 by each dendrite is denoted and fixed as  $G_{\text{SOM} \rightarrow \text{dend}} = 40$  nS, then for each SOM-dendrite con-  
702 nection the conductance is  $G_{\text{SOM} \rightarrow \text{dend}} / N_{\text{SOM} \rightarrow \text{dend}}$ . Each SOM-dendrite connection can con-  
703 tain multiple synapses, which we are not explicitly modeling here because GABAergic synapses  
704 are linear such that we only need to consider the total conductance. When  $N_{\text{SOM} \rightarrow \text{dend}}$  is not  
705 an integer, we interpolate. Each dendrite is targeted by  $\lceil N_{\text{SOM} \rightarrow \text{dend}} \rceil$  SOM neurons, where all  
706 synapses but one have weights  $G_{\text{SOM} \rightarrow \text{dend}} / N_{\text{SOM} \rightarrow \text{dend}}$ , while one has weight  $G_{\text{SOM} \rightarrow \text{dend}} \cdot (1 -$   
707  $\lceil N_{\text{SOM} \rightarrow \text{dend}} \rceil / N_{\text{SOM} \rightarrow \text{dend}})$ . Given the connection probability from SOM to pyramidal neurons  
708  $P_{\text{SOM} \rightarrow \text{pyr}}$ , the number of SOM neurons  $N_{\text{SOM}}$ , and the number of dendrites on each pyramidal  
709 neuron  $N_{\text{dend}}$ , we set

$$N_{\text{SOM} \rightarrow \text{dend}} = N_{\text{SOM}} \cdot [1 - (1 - P_{\text{SOM} \rightarrow \text{pyr}})^{N_{\text{dend}}}] \quad (28)$$

710 This is the mean number of SOM neurons targeting each dendrite if the SOM-to-pyramidal con-  
711 nections were completely independent and random.

712 The VIP-to-SOM connections are set in the same way as the SOM-to-dendrite connections.  
713 Since SOM neurons only have one compartment each, we have  $N_{\text{VIP} \rightarrow \text{SOM}} = N_{\text{VIP}} \cdot P_{\text{VIP} \rightarrow \text{SOM}}$ .  
714 When control inputs target both VIP and SOM neurons, we have  $P_{\text{VIP} \rightarrow \text{SOM}} = 0.6$ . When control  
715 inputs only target VIP neurons, we have  $P_{\text{VIP} \rightarrow \text{SOM}} = 0.1$ . Within  $100\mu\text{m}$  the connection proba-  
716 bility is measured to be around 0.6 (**Supplementary Table 1**). However, note that the connection  
717 probability from VIP to SOM neurons on a column scale is unknown. The spatially-restricted ax-  
718 onal arbors of VIP neurons<sup>31</sup> suggest that the connection probability may fall quickly as a func-  
719 tion of the VIP-SOM distance. Therefore on the scale of a column, the connection probability



720 could still be as low as 0.1. Total inhibitory connection weight from VIP neurons received by each  
 721 SOM neuron is 30 pA/Hz, and is distributed onto each synapse the same way SOM-to-dendrite  
 722 connection weights are set. For  $N_{VIP} = 140$  and  $P_{VIP \rightarrow SOM} = 0.6$ , the connection strength of each  
 723 synapse is about 0.4 pA/Hz. This is close to the unitary VIP-to-SOM IPSQ of 0.7 pA/Hz measured  
 724 in [4]. Notice here the connection is current-based because SOM neurons are described by a f-I  
 725 curve.

726 The SOM-to-PV, PV-to-PV, and PV-to-pyramidal soma connections are all set similar to the  
 727 connections above. We set  $P_{SOM \rightarrow PV} = 0.8$ ,  $P_{PV \rightarrow PV} = 0.9$ ,  $P_{PV \rightarrow soma} = 0.6^4$ . The total inhibitory  
 728 connection strength from SOM neurons to each PV neuron is varied in **Fig. 6b**. The total in-  
 729 hibitory connection from PV neurons to each PV neuron is 30 pA/Hz, and from PV neurons to  
 730 each pyramidal neuron is 30 pA/Hz. Denote the resulting connection weight matrix  $W_{SOM \rightarrow PV}$ ,  
 731  $W_{PV \rightarrow PV}$ ,  $W_{PV \rightarrow soma}$ , then in steady state the change in somatic inhibition  $\Delta \mathbf{I}_{pyr}$  across pyramidal  
 732 neurons is

$$\Delta \mathbf{I}_{soma} = W_{PV \rightarrow soma} \Delta \mathbf{r}_{PV} \quad (29)$$

733 where  $\Delta \mathbf{r}_{PV}$  is the change in PV activities. And we have

$$\Delta \mathbf{r}_{PV} = (\mathbf{1} / \beta_{PV} - W_{PV \rightarrow PV})^{-1} W_{SOM \rightarrow PV} \Delta \mathbf{r}_{SOM} \quad (30)$$

734 where  $\Delta \mathbf{r}_{SOM}$  is the change in SOM activities before and after control inputs.  $\mathbf{1}$  is identity matrix.  
 735 The precise values of these PV-related parameters do not matter.

736 Control inputs are excitatory. Here we are agnostic about their origin. They could be locally  
 737 generated or from long-range projections. Control inputs can target subsets of SOM and VIP  
 738 neurons. The mean strength of the control inputs across the whole population is always kept as  
 739 a constant. When control inputs target SOM neurons,  $N_{control,SOM} = \text{round}(N_{SOM} \cdot P_{control,SOM})$   
 740 of SOM neurons are targeted, with current  $75 \cdot N_{SOM} / N_{control,SOM}$  pA. Therefore across the whole  
 741 population the averaged current input is 75 pA. When control inputs target VIP neurons, each of  
 742 the  $N_{control,VIP}$  targeted VIP neurons fire at  $(5 \cdot N_{VIP} / N_{control,VIP})$  Hz. For **Fig. 5a-c** when control  
 743 inputs only target VIP neurons, we set  $P_{control,SOM} = 0$ ,  $P_{control,VIP} = 0.1$ .  $P_{control,VIP}$  has to be low  
 744 otherwise the gating selectivity would be very close to 0. For **Fig. 5d-f**, when control inputs  
 745 target both SOM and VIP neurons,  $P_{control,SOM} = 0.5$ ,  $P_{control,VIP} = 0.5$ . Setting  $P_{control,SOM} = 0.5$

746 does not result in the highest gating selectivity. We did not make particular efforts to fine-tune  
747 these parameters.

748 Finally, excitatory inputs carrying stimulus information for one pathway target the corre-  
749 sponding disinhibited dendrites. When we opened the gate for pathway 1, suppose one dendrite  
750 receives averaged inhibitory conductance  $\bar{g}_I$ . Then the total excitatory conductance  $\bar{g}_E$  from  
751 pathway 1 onto this dendrite is

$$\bar{g}_E = \begin{cases} (1 - \bar{g}_I / g_{I,\text{th}}) \cdot g_{E,\text{max}} & , \bar{g}_I < g_{I,\text{th}} \\ 0 & , \bar{g}_I \geq g_{I,\text{th}} \end{cases} \quad (31)$$

752  $g_{I,\text{th}}$  is a inhibitory conductance threshold we defined. Therefore when inhibition is weak (disin-  
753 hibition is strong), excitation is inversely proportional to inhibition level. However, when disin-  
754 hibition is weak, there will be no excitatory input at all. Having a cut-off threshold  $g_{I,\text{th}}$  prevents  
755 excitatory inputs from targeting every dendrite and therefore being overly dense. We set  $g_{I,\text{th}} =$   
756 4.0 nS. Since we have set the sum of conductances of all inhibitory synapses to be  $G_{\text{SOM} \rightarrow \text{dend}} =$   
757 40 nS, each SOM neuron fires around 10 Hz prior to disinhibition, and  $\tau_{\text{GABA,dend}} = 20$  ms, the  
758 time-averaged conductance received by each dendrite in default is  $\bar{g}_I = r_I \tau_{\text{GABA,dend}} G_{\text{SOM} \rightarrow \text{dend}} =$   
759 8.0 nS. Therefore by setting  $g_{I,\text{th}} = 4.0$  nS, excitatory synapses only target dendrites that are at  
760 least disinhibited by half. We set the maximum time-averaged excitatory conductance target-  
761 ing each dendrite to be  $g_{E,\text{max}} = 25$  nS. This value is chosen so that excitation is strong enough  
762 to excite a disinhibited dendrite, but not strong enough to excite a strongly inhibited dendrite  
763 (**Supplementary Fig. 4**).

764 In (**Supplementary Table 1**), we summarized the raw experimental data used to constrain  
765 the model.

## 766 **Synaptic plasticity model and learning protocol**

767 The synaptic plasticity model is calcium-based. The calcium dynamics is described above, and  
768 the synaptic weight change given these calcium dynamics is modeled with the formalism from  
769 [34], restated below for clarity with slightly modified notations.

770 Over the time of stimulation, the calcium trace spends time  $\alpha_p$  above the potentiation thresh-  
771 old  $\theta_p$ , and time  $\alpha_d$  above the depression threshold  $\theta_d$ . Then the average potentiation is  $\Gamma_p =$

772  $\gamma_p \alpha_p$ , and the average depression is  $\Gamma_d = \gamma_d \alpha_d$ , where  $\gamma_p$  and  $\gamma_d$  are the potentiation and de-  
 773 pression strengthes respectively. Since the synapse is assumed to be bistable (DOWN or UP  
 774 states), denote  $\rho$  as the probability of the synapse staying in the UP state, which evolves over  
 775 time in response to the calcium trace crossing thresholds. Then define  $\bar{\rho}$  as the long-term time  
 776 average of  $\rho$ , and  $\sigma_\rho^2$  as the standard deviation of  $\rho$ . Then

$$\bar{\rho} = \frac{\Gamma_p}{\Gamma_p + \Gamma_d} \quad (32)$$

$$\sigma_\rho^2 = \frac{\sigma^2(\alpha_p + \alpha_d)}{\Gamma_p + \Gamma_d} \quad (33)$$

777 where  $\sigma$  is the amplitude of noise and  $\tau$  is the time constant of weight change. In long term, the  
 778 probability to switch from DOWN to UP state  $\mathcal{U}$  and from UP to DOWN states  $\mathcal{D}$  are given by

$$\mathcal{U} = \frac{1}{2} \left( 1 + \operatorname{erf} \left( - \frac{0.5 - \bar{\rho} + \bar{\rho} e^{-(\Gamma_p + \Gamma_d)/\tau}}{\sqrt{\sigma_\rho^2 (1 - e^{-2(\Gamma_p + \Gamma_d)/\tau})}} \right) \right) \quad (34)$$

$$\mathcal{D} = \frac{1}{2} \left( 1 - \operatorname{erf} \left( - \frac{0.5 - \bar{\rho} + (\bar{\rho} - 1) e^{-(\Gamma_p + \Gamma_d)/\tau}}{\sqrt{\sigma_\rho^2 (1 - e^{-2(\Gamma_p + \Gamma_d)/\tau})}} \right) \right) \quad (35)$$

779  $\operatorname{erf}(\cdot)$  is the standard error function. For convenience, we set the weight of DOWN state to  $w_0 = 0$ ,  
 780 and the weight of UP state  $w_1 = 3$ . Then following stimulation, the weight after learning  $w_{\text{post}} =$   
 781  $w_{\text{pre}}(1 - \mathcal{D}) + (w_1 - w_{\text{pre}})\mathcal{U}$ , given the weight before learning  $w_{\text{pre}}$ .

782 We fitted the free parameters of the model with experimental data from [35]. In simulation of  
 783 the plasticity experiment, we modeled the pre-synaptic extracellular stimulation by 40 NMDAR  
 784 synapses simultaneously receiving one spike. This stimulation alone causes a 2.8 mV depolar-  
 785 ization on the soma, which is within the range of observed values (1–3 mV) for that experiment.  
 786 It also brings the dendrite close to the NMDA plateau threshold, allowing for strong interaction  
 787 between pre- and post-synaptic spikes. As in the experiment, all pairings are repeated 60 times.  
 788 The somatic shadow voltage is clamped at  $-60$  mV.

789 The model is fitted to data points from **Fig. 2 and 3d** in [35], and is used to predict data from  
 790 **Fig. 3b** therein. Notice that two data points in the test dataset (their **Fig. 3b**) are already included  
 791 in their **Fig. 2 and 3d**. In all of these cases, there is one pre-synaptic spike, and usually a burst of  
 792 post-synaptic spikes. The time lag in **Supplementary Fig. 7a** is defined as the timing difference  
 793 between the first post-synaptic spike in the burst and the pre-synaptic spike. In **Supplementary**  
 794 **Fig. 7a,b**, there are 3 post-synaptic spikes. In **Supplementary Fig. 7b,c**, the pre-synaptic spike

795 is either 10 ms earlier than the first post-synaptic spike in the burst, or 10 ms later than the last  
796 post-synaptic spike. In **Supplementary Fig. 7a,c**, the post-synaptic burst, when there is one,  
797 has frequency of 50 Hz (inter-spike-interval of 20 ms). The fit parameters are the following. The  
798 scaling parameters for calcium traces,  $\kappa_{\text{NMDA}} = 0.371$  and  $\kappa_{\text{VGCC}} = 0.957$ . The depression and po-  
799 tentiation rates are  $\gamma_d = 39.9$  and  $\gamma_p = 177.6$ . The potentiation threshold for calcium is  $\theta_p = 2.78$ .  
800 In fitting this particular dataset, we found that there is a certain level of redundancy in parame-  
801 ters; the number of parameters needed to be free is less than the total number of potentially free  
802 parameters. We therefore fixed two parameters using values in [34] which were fitted to another  
803 dataset: the amplitude of the noise  $\sigma = 3.35$  and the time constant of synaptic weight change  
804  $\tau = 346.36$  s. The depression threshold is  $\theta_d = 1$ . Before the plasticity-inducing experiment, we  
805 have  $w_{\text{pre}} = 1$  which corresponds to  $\tilde{g}_{\text{NMDA}} = 2.5$  nS for each NMDAR synapse. So after learning,  
806 the actual synaptic conductances are  $\tilde{g}_{\text{NMDA}} = w_{\text{post}} \cdot 2.5$  nS.

807 Just like the spiking pyramidal neuron model, the plasticity model fitted with *in-vitro* data  
808 needs to be recalibrated to behave properly under *in-vivo*-like conditions<sup>67</sup>. We reduced the  
809 scaling parameters for calcium traces to  $\hat{\kappa}_{\text{NMDA}} = 0.75\kappa_{\text{NMDA}}$ , mimicking a reduced extracel-  
810 lular calcium concentration, and to  $\hat{\kappa}_{\text{VGCC}} = 0.2\kappa_{\text{VGCC}}$ , resembling attenuated effect of back-  
811 propagating action potentials in high-conductance *in-vivo* state. These changes also ensure the  
812 weights of non-activated synapses do not change substantially throughout the simulation. In  
813 **Fig. 7b**, the plasticity inducing protocol is 300-s long. The post-synaptic firing is fixed at 10 Hz.

814 In **Fig. 7c-e**, inputs from both pathways initially target every dendrite with 15 synapses of the  
815 same weight  $\tilde{g}_{\text{NMDA}} = 2.5$  nS. Each gate is opened by disinhibiting 2 distinct dendritic branches.  
816 During learning, all synapses from the gated-on pathway are activated at 50 Hz, whereas the  
817 gated-off pathway is not activated. The post-synaptic rate is set at 10 Hz. To measure gating  
818 selectivity before learning, 8 of the 15 synapses on each dendrite are activated for both pathways.  
819 After learning 5 of 15 synapses were activated, the number is chosen so that before and after  
820 learning the total excitatory conductance is the same.

## 821 **Context-dependent decision-making network**

822 We modeled the context-dependent decision-making task from [26]. In the experimental task,  
823 the stimulus is a mixture of random dots that are leftward- or rightward-moving and are red or

824 green. The stimulus can be described by its motion and color coherence. Motion coherence for  
825 rightward motion can take 6 values ( $-0.5, -0.15, -0.05, 0.05, 0.15, 0.5$ ). Color coherence for color  
826 red also takes 6 values ( $-0.5, -0.18, -0.06, 0.06, 0.18, 0.5$ ). On each trial, the color and motion co-  
827 herence are independently and randomly chosen, resulting in 36 possible stimuli. In **Fig. 8d**, the  
828 performance with respect to motion coherence is averaged across all color coherences. Similarly  
829 for **Fig. 8e**, the performance with respect to color coherence is averaged across all motion co-  
830 herences. In **Fig. 8f**, the curve for strong motion coherence is averaged across motion coherence  
831  $-0.5$  and  $0.5$ . Similarly for medium and weak coherences.

832 The context-dependent decision-making circuit model contains two components. The first  
833 is a mixed-selective sensory network, which uses the VIP-SOM-pyramidal neuron circuit model  
834 described above. The mixed-selective sensory neurons receive motion and color inputs from the  
835 sensory stimulus. Here the motion and color inputs do not signal the actual motion and color of  
836 the stimulus, but rather the motion and color evidence for a particular target. For convenience,  
837 the motion direction corresponding to target 1 is denoted left, and the color corresponding to  
838 target 1 is denoted red, and similar for motion right and color green. This treatment follows the  
839 analyses and modeling of [26]. There are four pools of neurons in this network. Each pool prefers  
840 a particular combination of motion and color, e.g. left and red. Each neuron pool is modeled  
841 exactly as those in **Fig. 5d**, where the circuit connectivity is random and control inputs target  
842 both VIP and SOM neurons, using the base parameter set described above. The input to each  
843 dendrites is 15 NMDAR synapses with rate determined by the coherence (coh) of their preferred  
844 motion and color input, as  $40 \cdot (1 + \text{coh}) \text{ Hz}^{36,68}$ . For example, a neuron that prefers left and red  
845 inputs would receive  $40 \cdot (1 + \text{coh}_{\text{left}}) \text{ Hz}$  input on its dendrites targeted by motion pathway, and  
846  $40 \cdot (1 + \text{coh}_{\text{red}}) \text{ Hz}$  on its dendrites targeted by color pathway. Note that  $\text{coh}_{\text{left}} = -\text{coh}_{\text{right}}$ . The  
847 excitatory input for each pathway is set the same way as it is above, however now the maximum  
848 conductance of these input synapses  $g_{\text{sen}}$  is one free parameter.

849 The second component of the network is a decision network. This network is a two-pool  
850 rate model<sup>36</sup>, using the parameter set therein with no recurrent AMPAR current. The pool rep-  
851 resenting choice 1 receives input from a subset of the left-red neuron pool in the mixed-sensory  
852 network. Sensory neurons are sorted according to their gating selectivity, and only the top  $P_{\text{project}}$   
853 fraction of these sensory neurons project to the decision networks.  $P_{\text{project}}$  is also a free parame-

854 ter. The right-green pool projects to the choice 2 pool. The other two pools do not project to the  
855 decision network because only the left-red and the right-green pools have congruent preferences  
856 for choice 1 and choice 2, respectively, based on the how color and motion evidence are defined.  
857 In order to fit experimental behavioral choice data efficiently, we further approximated the deci-  
858 sion network with a decision function. We assumed that the probability of selecting choice 1 ( $P_1$ )  
859 is determined by the difference  $\Delta I_{\text{dec}}$  (pA) between the input currents to the two choice pools.  
860 We fitted this function by simulating the decision network with mean input current 15.6 pA to  
861 both pools, yielding

$$P_1 = \left[ 1 + \exp\left(\frac{-\Delta I_{\text{dec}}}{\sigma}\right) \right]^{-1} \quad (36)$$

862 with  $\sigma = 0.99$  pA. The second free parameter of the model is the projection strength  $J_{\text{dec}}$  of the  
863 mixed-sensory input, such that  $\Delta I_{\text{dec}} = J_{\text{dec}}(r_{\text{left,red}} - r_{\text{right,green}})$ .  $r_{\text{left,red}}$  is the average firing rate  
864 of the left/red-preferring pool.

865 The three free parameters  $g_{\text{sen}}, P_{\text{project}}, J_{\text{dec}}$  are fitted to behavioral data of each monkey in  
866 [26]. The fit parameter values are  $g_{\text{sen}} = 1.21$  nS,  $P_{\text{project}} = 0.36$  and  $J_{\text{dec}} = 15.0$  pA/Hz for mon-  
867 key F, and are  $g_{\text{sen}} = 1.80$  nS,  $P_{\text{project}} = 0.083$  and  $J_{\text{dec}} = 4.37$  pA/Hz for monkey A. Importantly,  
868 the data used to fit the model is far from being sufficient. Also our circuit model is simplistic.  
869 Therefore these fitted parameter values do not reflect our estimates of these quantities in the  
870 brain. Rather, these fittings demonstrate that the proposed circuit architecture can potentially  
871 capture behavioral performance. As shown in **Supplementary Fig. 8**, if neural gating is strongly  
872 degraded, then no set of these fit parameters can capture behavioral performance.

### 873 **Model fitting in general**

874 Model parameters are fitted to experimental or simulation data in various contexts. These fitted  
875 models include the rate pyramidal neuron, the calcium-based plasticity model, and the context-  
876 dependent decision-making network. In all these cases, parameters are chosen to minimize the  
877 squared-error between the model and data using sequential least squares programming (SLSQP)  
878 method from the SciPy library (`scipy.optimize.minimize`, with method 'SLSQP').

879 51. Branco, T., Clark, B. A. & Häusser, M. Dendritic discrimination of temporal input sequences  
880 in cortical neurons. *Science* **329**, 1671–5 (2010).

- 881 52. Hines, M. L. & Carnevale, N. T. The NEURON simulation environment. *Neural Comput* **9**,  
882 1179–209 (1997).
- 883 53. Murphy, B. K. & Miller, K. D. Multiplicative gain changes are induced by excitation or inhi-  
884 bition alone. *J Neurosci* **23**, 10040–51 (2003).
- 885 54. Nevian, T., Larkum, M. E., Polsky, A. & Schiller, J. Properties of basal dendrites of layer 5  
886 pyramidal neurons: a direct patch-clamp recording study. *Nat Neurosci* **10**, 206–14 (2007).
- 887 55. Larkum, M. E., Senn, W. & Lüscher, H.-R. Top-down dendritic input increases the gain of  
888 layer 5 pyramidal neurons. *Cereb Cortex* **14**, 1059–70 (2004).
- 889 56. Rudolph, M. & Destexhe, A. A fast-conducting, stochastic integrative mode for neocortical  
890 neurons in vivo. *J Neurosci* **23**, 2466–76 (2003).
- 891 57. Goodman, D. & Brette, R. Brian: a simulator for spiking neural networks in python. *Front*  
892 *Neuroinform* **2**, 5 (2008).
- 893 58. Marlin, J. J. & Carter, A. G. GABA-A receptor inhibition of local calcium signaling in spines  
894 and dendrites. *J Neurosci* **34**, 15898–911 (2014).
- 895 59. Ali, A. B. & Thomson, A. M. Synaptic alpha 5 subunit-containing GABAA receptors mediate  
896 IPSPs elicited by dendrite-preferring cells in rat neocortex. *Cereb Cortex* **18**, 1260–71 (2008).
- 897 60. Shoemaker, P. A. Neural bistability and amplification mediated by NMDA receptors: Analy-  
898 sis of stationary equations. *Neurocomputing* **74**, 3058–3071 (2011).
- 899 61. Ascher, P & Nowak, L. The role of divalent cations in the N-methyl-D-aspartate responses  
900 of mouse central neurones in culture. *J Physiol* **399**, 247–66 (1988).
- 901 62. Ishikawa, T., Sahara, Y. & Takahashi, T. A single packet of transmitter does not saturate post-  
902 synaptic glutamate receptors. *Neuron* **34**, 613–21 (2002).
- 903 63. Popescu, G., Robert, A., Howe, J. R. & Auerbach, A. Reaction mechanism determines NMDA  
904 receptor response to repetitive stimulation. *Nature* **430**, 790–3 (2004).
- 905 64. Lu, J.-t., Li, C.-y., Zhao, J.-P., Poo, M.-m. & Zhang, X.-h. Spike-timing-dependent plasticity  
906 of neocortical excitatory synapses on inhibitory interneurons depends on target cell type. *J*  
907 *Neurosci* **27**, 9711–20 (2007).

- 908 65. Lee, S., Hjerling-Leffler, J., Zaghera, E., Fishell, G. & Rudy, B. The largest group of superficial  
909 neocortical GABAergic interneurons expresses ionotropic serotonin receptors. *J Neurosci*  
910 **30**, 16796–808 (2010).
- 911 66. Larkman, A. U. Dendritic morphology of pyramidal neurones of the visual cortex of the rat:  
912 III. Spine distributions. *J Comp Neurol* **306**, 332–43 (1991).
- 913 67. Higgins, D., Graupner, M. & Brunel, N. Memory maintenance in synapses with calcium-  
914 based plasticity in the presence of background activity. *PLoS Comput Biol* **10**, e1003834  
915 (2014).
- 916 68. Britten, K. H., Shadlen, M. N., Newsome, W. T. & Movshon, J. A. Responses of neurons in  
917 macaque MT to stochastic motion signals. *Vis Neurosci* **10**, 1157–69 (1993).



# Dendritic Disinhibition as a Mechanism for Pathway-Specific Gating

## Supplemental Information

Guangyu Robert Yang, John D. Murray, Xiao-Jing Wang

### Contents

|                                                                                                 |           |
|-------------------------------------------------------------------------------------------------|-----------|
| <b>1 Supplemental Figures</b>                                                                   | <b>2</b>  |
| <b>2 Supplemental Table</b>                                                                     | <b>11</b> |
| <b>3 Mathematical Appendix</b>                                                                  | <b>11</b> |
| 3.1 Gating selectivity critically depends on $N_{\text{SOM} \rightarrow \text{dend}}$ . . . . . | 11        |
| 3.2 Gating selectivity strictly improves with somatic inhibition . . . . .                      | 15        |

## 1 Supplemental Figures

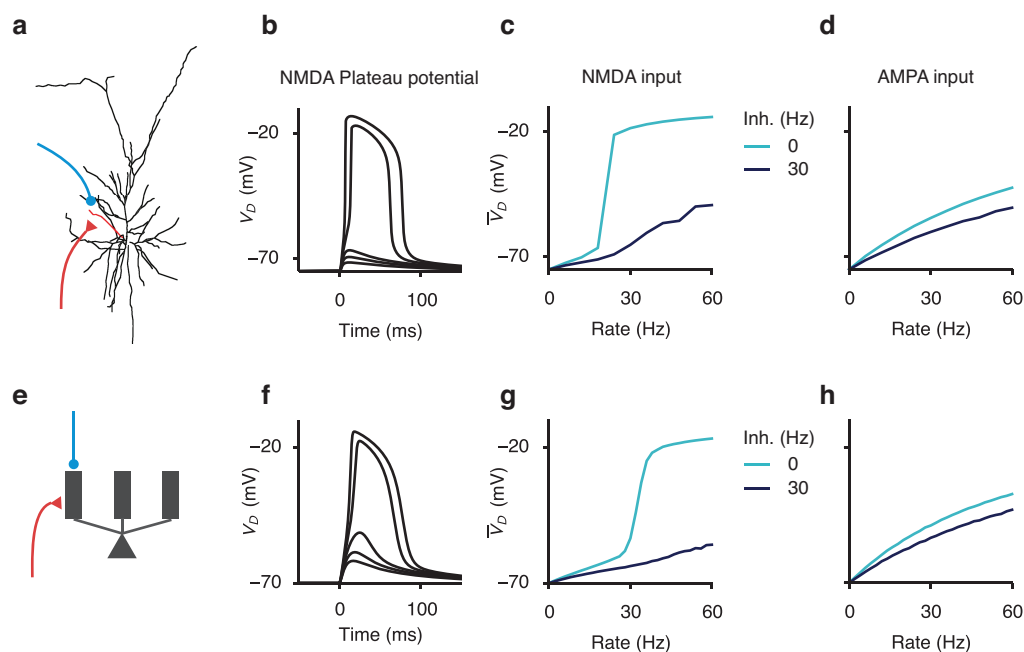

**Figure S1.** Dendritic disinhibition powerfully gates dendritic nonlinearity.

(a-d) Dendritic disinhibition controls NMDAR-dependent nonlinearity in a reconstructed compartmental neuron model. (a) A morphologically reconstructed compartmental model of a layer 2/3 pyramidal neuron (1) receives excitatory and inhibitory inputs uniformly distributed onto one basal dendrite. (b) Excitatory inputs can generate a local, regenerative NMDA plateau potential in the dendrite. As the number of activated synapses is increased, there is a sharp nonlinear increase in the evoked dendritic membrane depolarization ( $V_D$ ). (c-d) Presynaptic spike times are modeled as Poisson-distributed events. (c) In response to synaptic input mediated by NMDAR channels, the mean dendritic voltage across time ( $\bar{V}_D$ ) increases nonlinearly as a function of excitatory rate (light blue). Moderate inhibition largely suppresses NMDA plateau potentials even for high excitatory input rate (dark blue). (d) The effect of inhibition is much weaker when excitatory input is mediated by AMPARs. 20 excitatory synapses are used as input in (c,d). (e-h) A reduced compartmental neuron model captures the nonlinearity of the morphologically reconstructed model. (e) A somatic compartment is connected to multiple, otherwise independent, dendritic compartments (only three shown). (f-g) Modeling results in the reconstructed neuron model (b-d) are reproduced by the simplified model. 15 excitatory synapses are used as input in (g,h).

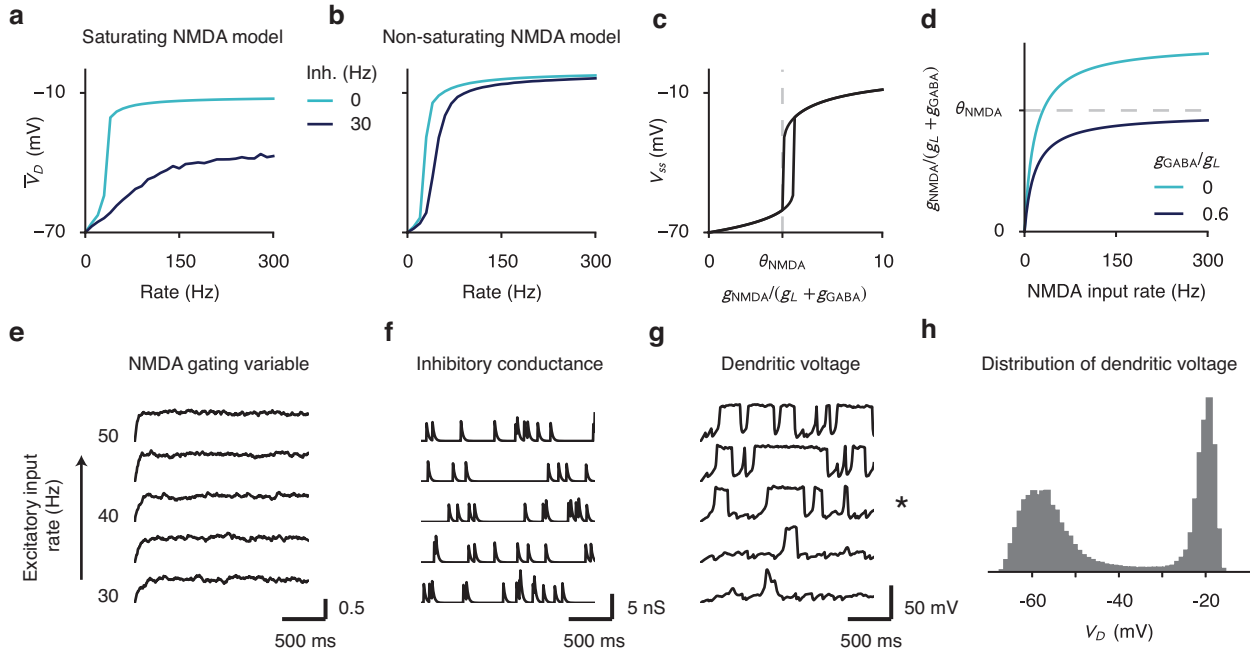

**Figure S2.** Effects of NMDA receptor saturation and low-rate inhibition. **(a-d)** NMDAR saturation allows for much stronger inhibitory control. **(a)** Using an NMDAR model with saturation allows mild dendritic inhibition to powerfully control dendritic voltage. Note that voltage of the inhibited dendrite (dark blue) never reaches the same level as the disinhibited dendrite (light blue). **(b)** The same level of inhibition has a much smaller effect when we used a non-saturating NMDAR model. **(c)** For constant synaptic conductance, the steady-state voltage of one dendritic branch ( $V_{ss}$ ) increases sharply with the effective input  $g_{NMDA}/(g_L + g_{GABA})$ , where  $g_{NMDA}$ ,  $g_L$ , and  $g_{GABA}$  are the NMDAR, leak, and GABAR conductances, respectively. The dashed line indicates the threshold  $\theta_{NMDA}$  below which  $V_{ss}$  is stably in the low state. **(d)** The NMDR conductance, and therefore  $g_{NMDA}/(g_L + g_{GABA})$ , saturates at high input rates to NMDAR synapses. With moderate inhibition, the saturated value of the effective input can be lower than the threshold  $\theta_{NMDA}$  for an NMDA plateau potential. **(e-h)** Low-rate (temporally sparse) Poisson inhibition generates irregular NMDA plateau potentials and graded encoding of input rate. Inhibition is said to be temporally sparse when the product of the inhibition rate  $r_I$  and the time constant  $\tau_{GABA}$  of GABAR is much smaller than 1, i.e.  $r_I \cdot \tau_{GABA} \ll 1$  **(e)** Due to relatively high input rate and long time constant, the NMDAR gating variable averaged across synapses is nearly constant in time. Each trace corresponds to a different excitatory input rate, ranging from 30Hz (bottom) to 50Hz (top); the same applies to **(f,g)**. **(f)** Inhibitory conductance is temporally sparse due to a low background inhibition rate of 5 Hz. **(g)** The dendritic voltage switches stochastically in time, into and out of the NMDA plateau potential. **(h)** The dendritic voltage across time exhibits a bimodal distribution, due to stochastic switching. The excitatory rate is set to 40 Hz (asterisk in **(g)**).

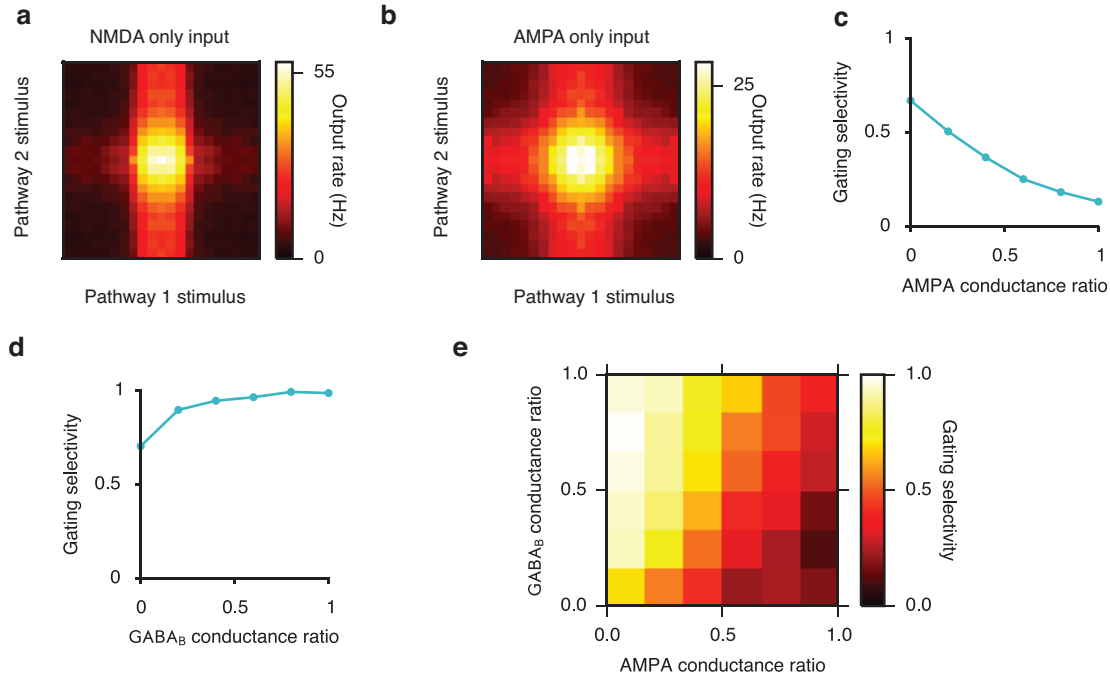

**Figure S3.** Pathway-specific gating with varying levels of AMPAR and GABA<sub>B</sub> conductance. In the majority of our work, dendritic excitation is mediated only by NMDARs and dendritic inhibition only by GABA<sub>B</sub>Rs. Here we show how pathway-specific gating varies with the inclusion of AMPAR and GABA<sub>B</sub> inputs. **(a)** Pathway-specific gating when excitatory input is mediated solely by NMDARs, adapted from **Fig. 2g** for comparison. **(b)** When the excitatory input is conducted solely by AMPARs (maximum conductance  $\bar{g}_{\text{AMPA}} = 2.5$  nS for each synapse), the gating performance is strongly degraded. All other conditions are kept the same in **(a)** and **(b)**. Disinhibited dendrites receive 30-Hz disinhibition. **(c)** Gating selectivity (which ranges from 0 for no gating to 1 for perfect gating, see Experimental Procedures for the definition) decreases as a function of the AMPA conductance ratio. Here AMPA conductance ratio is defined as  $\bar{g}_{\text{AMPA}} / (\bar{g}_{\text{AMPA}} + \bar{g}_{\text{NMDA}})$ , which is 0 in the NMDAR-only case and 1 in the AMPAR-only case.  $\bar{g}_{\text{AMPA}} + \bar{g}_{\text{NMDA}}$  is held constant at 2.5 nS. **(d)** Gating selectivity increases as a function of the GABA<sub>B</sub> conductance ratio. This is due to both the slower dynamics of GABA<sub>B</sub> receptors and the inward-rectifying potassium (KIR) conductance activated by GABA<sub>B</sub> receptors (2; 3). Here excitatory inputs are mediated by NMDARs only. **(e)** Gating selectivity remains high for a wide range of combinations of AMPA and GABA<sub>B</sub> conductance ratio.

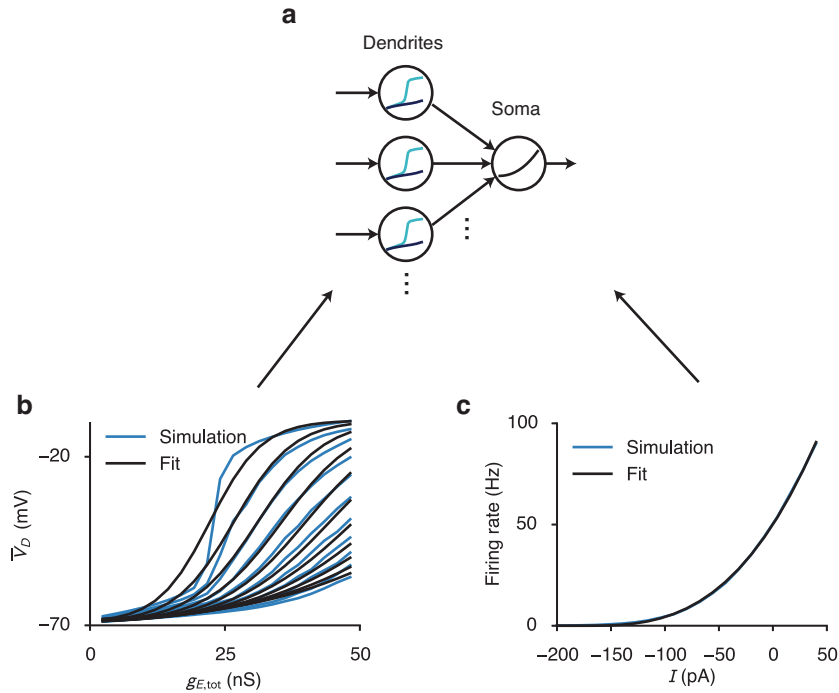

**Figure S4.** Multi-compartment rate model for pyramidal neurons based on the reduced spiking neuron model. (a) The neuron model is comprised of multiple dendrite compartments, whose mean voltages are modeled with a family of sigmoidal functions. These dendritic voltages are converted into currents and fed into a somatic compartment, whose firing rate output is modeled with a power-law function. (b) The mean dendritic voltage ( $\bar{V}_D$ ) as a function of excitatory and inhibitory inputs. (Blue) Simulation of the reduced-compartmental spiking neuron model. 15 NMDAR inputs fire at a Poisson rate of 30 Hz with conductance ranging from 0.25 to 5.0 nS, resulting in total conductance ( $\bar{g}_E$ ) approximately between 0 and 50 nS. Each curve corresponds to a different inhibitory input rate, ranging uniformly from 0 Hz (top curve) to 100 Hz (bottom curve), in increment of 10 Hz. (Black) Fit of the simulation results. All curves are simultaneously fit with a family of sigmoidal functions, where parameters of the sigmoid, i.e. mid-point and width, are controlled by inhibition. The back-propagating action potential is fixed at a rate of 10 Hz. (c) Somatic firing rate as a function of input current from dendrites (and potentially PV neurons). In our model, since at resting state the mean dendritic voltage is lower than the somatic voltage, the input current is negative. The simulation result of the spiking model (Blue) is fit with a power-law function (Black).

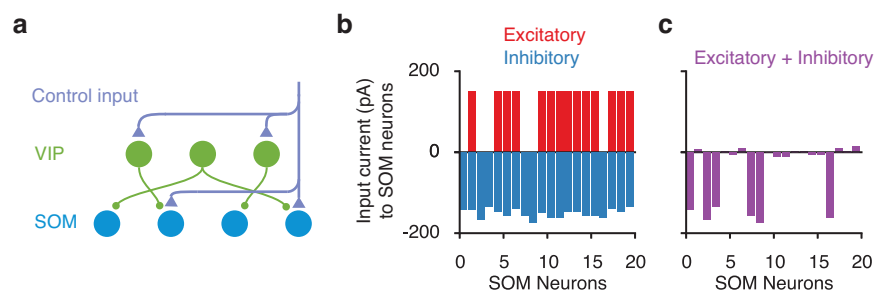

**Figure S5.** Mechanism of control. **(a)** In this scenario, we assume that for each pathway control inputs target a random subset of VIP and SOM neurons. **(b-c)** Input currents onto SOM neurons (only 20 shown). **(b)** 50% of the SOM neurons receive excitatory currents from control (red). 50% of VIP neurons receive excitatory control, but due to the high random connectivity from VIP to SOM neurons, inhibitory currents onto SOM cells are nearly uniform (blue). **(c)** The sum of the excitatory and inhibitory currents onto SOM neurons, i.e. the total currents, are primarily inhibitory and vary strongly across SOM neurons. The overall inhibitory currents are results of overall stronger inhibition. The variability across SOM neurons are mainly inherited from the selective excitatory control input.

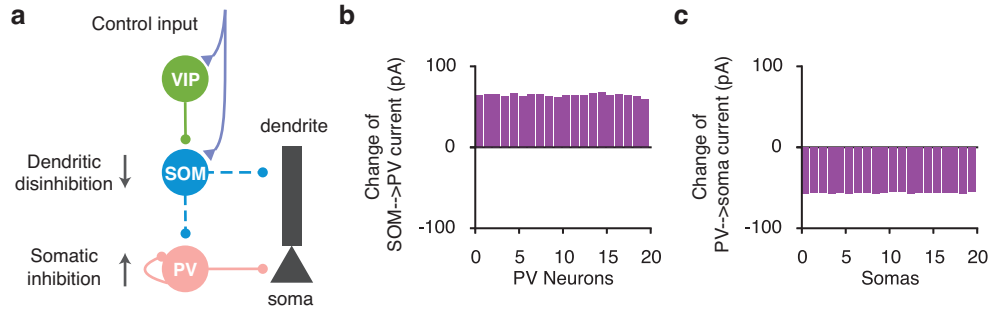

**Figure S6.** Inclusion of PV neurons results in a uniform somatic inhibition across pyramidal neurons. (a) SOM suppression lead to PV disinhibition and somatic inhibition. Same as **Fig. 6a**. (b) The change in the SOM-to-PV input currents after the control input. The change in currents is disinhibitory (net excitatory) with a small standard deviation compared to the mean across PV neurons. Notice that although the control input results in a selective suppression of SOM neurons (**Supplementary Fig. 5c**), the change in the SOM-to-PV currents is almost uniform due to the high SOM-to-PV connection probability. (c) The change in the PV-to-soma input currents after the control input is net inhibitory and again uniform across somas. Therefore a selective suppression of SOM neurons results in a non-selective inhibition across somas through PV neurons.



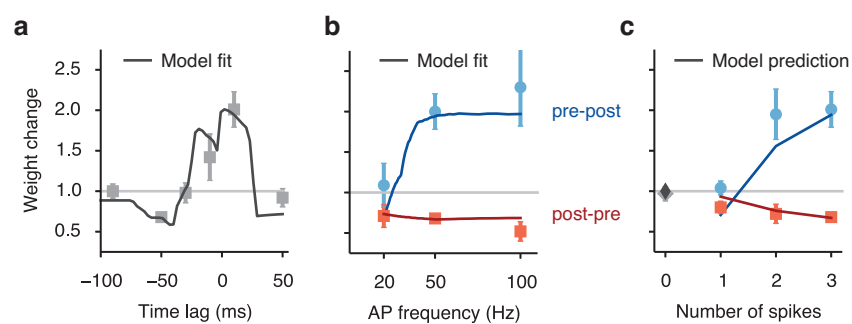

**Figure S7.** Fit and prediction of the plasticity model compared to experimental data. **(a-c)** A pre-synaptic spike is paired with multiple post-synaptic action potentials (AP). Light symbols mark data showing synaptic weight change (weight after learning/weight before learning) when varying the pre-post time lag **(a)**, post-synaptic AP frequency **(b)**, and number of post-synaptic spikes **(c)**. In **(b,c)**, the presynaptic spike either precedes (blue) or follows (red) the postsynaptic spikes. Curves in **(a-b)** show the model fit, with the same set of parameters. **(c)** The model generalizes to predict data not used to fit the model. Experimental data are extracted from (4).

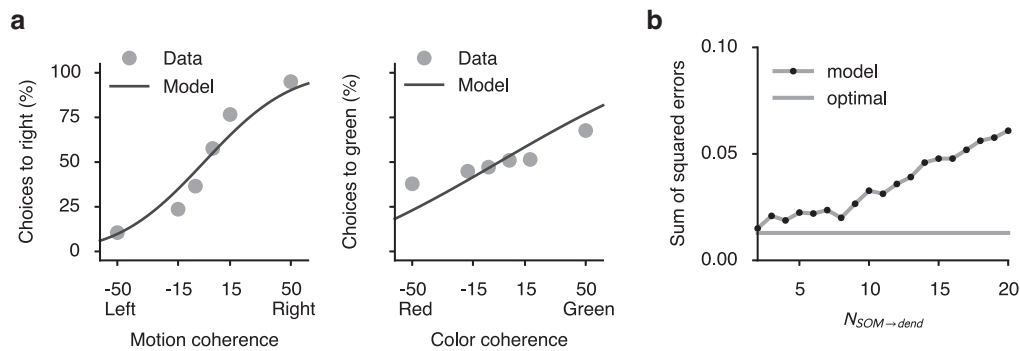

**Figure S8.** Fits of behavioral data as we vary parameters of the interneuronal circuit. (a) The model fit to behavioral data in motion context when we set  $N_{SOM \rightarrow dend} = 20$ . The fit is much degraded compared to **Fig. 8**. From **Fig. 4** we know that  $N_{SOM \rightarrow dend}$  is the critical parameter for gating selectivity measured on the neural level. (b) The sum of squared errors of the model fit as a function of  $N_{SOM \rightarrow dend}$ . For a large range of  $N_{SOM \rightarrow dend}$ , the model can nearly fit the data optimally. The fit starts to degrade when  $N_{SOM \rightarrow dend} > 10$ . Dashed line indicates the error level of the optimal sigmoidal fit, where data are directly fitted to logistic functions. The sum of squared errors shown here is the median error of 50 different model realizations and fits.

## 2 Supplemental Table

## 3 Mathematical Appendix

### 3.1 Gating selectivity critically depends on $N_{\text{SOM} \rightarrow \text{dend}}$

The gating selectivity is defined as the mean gating selectivity across neurons,

$$\text{Gating selectivity} = E_{\text{neuron}} \left[ \frac{r_{\text{on}} - r_{\text{off}}}{r_{\text{on}} + r_{\text{off}}} \right] \quad (1)$$

For each neuron, the neural activity given the gated-on pathway is

$$\tilde{r}_{\text{on}} = f_r(\langle \bar{V}_{D,\text{on}} \rangle) \quad (2)$$

, where  $\langle \bar{V}_{D,\text{on}} \rangle$  is the mean dendritic voltage across all the dendrites on that neuron for the gated-on pathway. Notice here for simplicity we used an input-output formulation for the somatic compartment that is slightly different from the one used in the main text (the results are the same)

$$r = f_r(\langle \bar{V}_D \rangle) = r_0 + \left( \frac{\langle \bar{V}_D \rangle - E_L}{V_r} \right)^{n_r} \quad (3)$$

After correcting for the baseline, we have

$$r_{\text{on}} = f_r(\langle \bar{V}_{D,\text{on}} \rangle) - f_r(E_L) \quad (4)$$

$$= \left( \frac{\langle \bar{V}_{D,\text{on}} \rangle - E_L}{V_r} \right)^{n_r} \quad (5)$$

Similarly

$$r_{\text{off}} = \left( \frac{\langle \bar{V}_{D,\text{off}} \rangle - E_L}{V_r} \right)^{n_r} \quad (6)$$

So

$$r_{\text{off}}/r_{\text{on}} = \left[ (\langle \bar{V}_{D,\text{off}} \rangle - E_L) / (\langle \bar{V}_{D,\text{on}} \rangle - E_L) \right]^{n_r} \quad (7)$$

In the limit of large number of dendrites on each pyramidal neuron, we can replace the averaged dendritic voltage with its expectation over dendrites  $E_D[\cdot]$ .

$$\langle \bar{V}_{D,\text{on}} \rangle \approx E_D \left[ \bar{V}_{D,\text{on}} \right] \quad (8)$$

| Parameter                                                                           | Value              | References | Layer | Area                      | Animal |
|-------------------------------------------------------------------------------------|--------------------|------------|-------|---------------------------|--------|
| Proportion of SOM neurons among inhibitory neurons                                  | 0.208              | (5)        | L2/3  | S1                        | mouse  |
| Proportion of VIP neurons among inhibitory neurons                                  | 0.2                | (5)        | L2/3  | S1                        | mouse  |
| Total number of inhibitory neurons in a column                                      | $676 \pm 116$      | (6)        | L2/3  | S1                        | rat    |
| Baseline activity of SOM neurons                                                    | $6.2 \pm 0.7$ Hz   | (7)        | L2/3  | S1                        | mouse  |
| Unitary IPSQ from SOM to pyramidal neurons                                          | $1.5 \pm 0.3$ pC   | (8)        | L2/3  | V1                        | mouse  |
| Unitary IPSQ from VIP to SOM neurons                                                | $0.69 \pm 0.33$ pC | (8)        | L2/3  | V1                        | mouse  |
| Connection probability from SOM to pyramidal neurons (within $200\mu\text{m}$ )     | $0.71 \pm 0.03$    | (9)        | L2/3  | frontal cortex            | mouse  |
| Connection probability from VIP to SOM neurons (within $25 - 100\mu\text{m}$ )      | $0.625 \pm 0.12$   | (8)        | L2/3  | V1                        | mouse  |
| Number of basal dendrites on each pyramidal cell (number of total tips)             | $28.8 \pm 2.4$     | (10)       | L2/3  | V1                        | rat    |
| Number of basal dendrites on each pyramidal cell (maximum branches at fixed radius) | $20 \pm 2.6$       | (11)       | L3    | V1                        | monkey |
| Number of basal dendrites on each pyramidal cell (maximum branches at fixed radius) | $34.2 \pm 4.9$     | (11)       | L3    | anterior cingulate cortex | monkey |

**Table S1.** Raw experimental data used to constrain the VIP-SOM-pyramidal disinhibitory circuit. The error estimates are also taken from the references when available. Some of the data are extracted from their figures since the value is not reported in texts. Specifically, the proportion of VIP neurons is inferred from the proportion of 5HT3a neurons among interneurons and proportion of VIP neurons among 5HT3a neurons.

| Model                                                      | Figure                                       |
|------------------------------------------------------------|----------------------------------------------|
| Fully-reconstructed spiking pyramidal neuron model         | <b>Supplementary Fig. 1a-d</b>               |
| Reduced multi-compartmental spiking pyramidal neuron model | <b>Fig. 2,7, Supplementary Fig. 1e-h,2,3</b> |
| Multi-compartmental rate pyramidal neuron model            | <b>Fig. 3-6,8, Supplementary Fig. 4-6,8</b>  |
| Rate SOM neurons                                           | <b>Fig. 4-6,8, Supplementary Fig. 5,6,8</b>  |
| Rate VIP neurons                                           | <b>Fig. 5,6,8, Supplementary Fig. 5,6,8</b>  |
| Rate PV neurons                                            | <b>Fig. 6, Supplementary Fig. 6</b>          |
| Calcium-based synaptic plasticity                          | <b>Fig. 7, Supplementary Fig. 7</b>          |

**Table S2.** All types of models used, and their corresponding result figures.

Under this approximation,  $r_{\text{on}}$  and  $r_{\text{off}}$  would be the same for every neuron, therefore we have

$$\text{Gating selectivity} = \frac{r_{\text{on}} - r_{\text{off}}}{r_{\text{on}} + r_{\text{off}}} \quad (9)$$

$$= -1 + 2 / \left( 1 + \left[ (E_D[\bar{V}_{D,\text{off}}] - E_L) / (E_D[\bar{V}_{D,\text{on}}] - E_L) \right]^{n_r} \right) \quad (10)$$

$$(11)$$

Since dendritic voltage is determined by the total excitatory and inhibitory conductance received,

$$\bar{V}_D = f_V(\bar{g}_E, \bar{g}_I) \quad (12)$$

$$= 30 \cdot \left[ 1 + \tanh \left( \frac{\bar{g}_E - g_{1/2}}{\beta} \right) \right] + V_0 + E_L \quad (13)$$

$$= 30 \cdot \left[ 1 + \tanh \left( \frac{\bar{g}_E - b_g \cdot (g_{L,D} + \bar{g}_I)}{k \cdot \exp(\bar{g}_I/\gamma)} \right) \right] + V_0 + E_L \quad (14)$$

$$(15)$$

Remember that for each pathway, we assume that the excitatory input conductance is a deterministic function of the inhibitory conductance received when the corresponding gate is

open.

$$\bar{g}_E = \begin{cases} (1 - \bar{g}_I / g_{I,\text{th}}) \cdot g_{E,\text{max}} & , \bar{g}_I < g_{I,\text{th}} \\ 0 & , \bar{g}_I \geq g_{I,\text{th}} \end{cases} \quad (16)$$

Denote this rectified linear function as  $\bar{g}_E = f_E(\bar{g}_I)$ . For convenience consider two pathways, the inhibitory conductance for gate 1 is  $\bar{g}_{I,1}$  and for gate 2 is  $\bar{g}_{I,2}$ . And excitatory conductance for pathway 1 and 2 are  $\bar{g}_{E,1} = f_E(\bar{g}_{I,1})$  and  $\bar{g}_{E,2} = f_E(\bar{g}_{I,2})$  respectively. Then

$$E_D [\bar{V}_{D,\text{on}}] = 30 \cdot \left[ 1 + E_D \left[ \tanh \left( \frac{f_E(\bar{g}_{I,1}) - b_g \cdot (g_{L,D} + \bar{g}_{I,1})}{k \cdot \exp(\bar{g}_{I,1} / \gamma)} \right) \right] \right] + V_0 + E_L \quad (17)$$

$$(18)$$

and

$$E_D [\bar{V}_{D,\text{off}}] = 30 \cdot \left[ 1 + E_D \left[ \tanh \left( \frac{f_E(\bar{g}_{I,2}) - b_g \cdot (g_{L,D} + \bar{g}_{I,1})}{k \cdot \exp(\bar{g}_{I,1} / \gamma)} \right) \right] \right] + V_0 + E_L \quad (19)$$

$$(20)$$

We assumed that each dendrite is targeted strictly by  $N_{\text{SOM} \rightarrow \text{dend}}$  SOM neurons, and since we are keeping the total amount of inhibition  $G_{\text{SOM} \rightarrow \text{dend}}$  received by each dendrite fixed, the time-averaged conductance of each connection is  $G_{\text{SOM} \rightarrow \text{dend}} / N_{\text{SOM} \rightarrow \text{dend}}$ . We also assumed that each SOM neuron gets suppressed with probability  $1 - p$ . Then the number of non-suppressed SOM neurons targeting each dendrite  $n_{\text{SOM} \rightarrow \text{dend}}$  follows a binomial distribution

$$n_{\text{SOM} \rightarrow \text{dend}} \sim B(N_{\text{SOM} \rightarrow \text{dend}}, p) \quad (21)$$

And

$$\bar{g}_{I,1} = G_{\text{SOM} \rightarrow \text{dend}} / N_{\text{SOM} \rightarrow \text{dend}} \cdot n_{\text{SOM} \rightarrow \text{dend}} \quad (22)$$

Therefore  $N_{\text{SOM} \rightarrow \text{dend}}$  determines the distribution for  $\bar{g}_{I,1}$ ,  $\bar{g}_{I,2}$ ,  $\bar{g}_{E,1}$ ,  $\bar{g}_{E,2}$ ,  $E_D [\bar{V}_{D,\text{on}}]$ ,  $E_D [\bar{V}_{D,\text{off}}]$ , and finally the gating selectivity. In summary, in the limit of a large number of dendrites, we have shown that gating selectivity only depends on the parameter  $N_{\text{SOM} \rightarrow \text{dend}}$ .

### 3.2 Gating selectivity strictly improves with somatic inhibition

Denote the f-I response function of the somatic compartment as  $f(\cdot)$ , and assume the dendritic input current to the soma is  $I_{\text{on}}$  and  $I_{\text{off}}$  when the gate is open or closed respectively. Also denote the somatic inhibitory current as  $I_{\text{PV}}$ . For convenience, assume  $I_{\text{PV}} > 0$ , so the outputs of the pyramidal neuron are

$$r_{\text{on}} = f(I_{\text{on}} - I_{\text{PV}}) \quad (23)$$

$$r_{\text{off}} = f(I_{\text{off}} - I_{\text{PV}}) \quad (24)$$

respectively. We consider only the case when  $r_{\text{on}}, r_{\text{off}} > 0$ , which means input stimuli have a net excitatory effect. Also we have  $I_{\text{PV}} < I_{\text{off}}$ . Since  $r_{\text{on}}, r_{\text{off}}$  are baseline corrected, we should have  $f(0) = 0$ . Here we derive the necessary and sufficient condition for gating selectivity

$$S = \frac{r_{\text{on}} - r_{\text{off}}}{r_{\text{on}} + r_{\text{off}}} \quad (25)$$

to strictly increase with  $I_{\text{PV}}$ .

We have

$$\frac{\partial S}{\partial I_{\text{PV}}} \quad (26)$$

$$= \frac{\partial}{\partial I_{\text{PV}}} \left[ \frac{r_{\text{on}} - r_{\text{off}}}{r_{\text{on}} + r_{\text{off}}} \right] \quad (27)$$

$$= \frac{1}{(r_{\text{on}} + r_{\text{off}})^2} \cdot [(r_{\text{on}} + r_{\text{off}}) \frac{\partial}{\partial I_{\text{PV}}} (r_{\text{on}} - r_{\text{off}}) - (r_{\text{on}} - r_{\text{off}}) \frac{\partial}{\partial I_{\text{PV}}} (r_{\text{on}} + r_{\text{off}})] \quad (28)$$

$$= \frac{2}{(r_{\text{on}} + r_{\text{off}})^2} \cdot [r_{\text{off}} \frac{\partial r_{\text{on}}}{\partial I_{\text{PV}}} - r_{\text{on}} \frac{\partial r_{\text{off}}}{\partial I_{\text{PV}}}] \quad (29)$$

So

$$\frac{\partial S}{\partial I_{\text{PV}}} < 0 \quad (30)$$

is equivalent to

$$r_{\text{off}} \frac{\partial r_{\text{on}}}{\partial I_{\text{PV}}} < r_{\text{on}} \frac{\partial r_{\text{off}}}{\partial I_{\text{PV}}} \quad (31)$$

In a few more steps, we can easily derive that the necessary and sufficient condition for gating selectivity to improve with somatic inhibition is that

$$(f'(I))^2 - f(I) \cdot f''(I) > 0, \forall I > 0 \quad (32)$$

where  $f'(I) = \frac{df(I)}{dI}$ .

We can easily see that for any power law function  $f(I) = aI^b$ ,

$$(f'(I))^2 - f(I) \cdot f''(I) = (abI^{b-1})^2 - aI^b ab(b-1)I^{b-2} \quad (33)$$

$$= a^2 b I^{2b-2} \quad (34)$$

is strictly larger than 0, as long as  $b > 0$ .

## References

- [1] Branco, T., Clark, B. A. & Häusser, M. Dendritic discrimination of temporal input sequences in cortical neurons. *Science* **329**, 1671–5 (2010).
- [2] Shoemaker, P. A. Neural bistability and amplification mediated by NMDA receptors: Analysis of stationary equations. *Neurocomputing* **74**, 3058–3071 (2011).
- [3] Sanders, H., Berends, M., Major, G., Goldman, M. S. & Lisman, J. E. Nmda and gabab (kir) conductances: the "perfect couple" for bistability. *J Neurosci* **33**, 424–9 (2013).
- [4] Nevian, T. & Sakmann, B. Spine Ca<sup>2+</sup> signaling in spike-timing-dependent plasticity. *J Neurosci* **26**, 11001–13 (2006).
- [5] Lee, S., Hjerling-Leffler, J., Zagha, E., Fishell, G. & Rudy, B. The largest group of superficial neocortical GABAergic interneurons expresses ionotropic serotonin receptors. *J Neurosci* **30**, 16796–808 (2010).
- [6] Meyer, H. S. *et al.* Inhibitory interneurons in a cortical column form hot zones of inhibition in layers 2 and 5a. *Proc Natl Acad Sci U S A* **108**, 16807–12 (2011).
- [7] Gentet, L. J. *et al.* Unique functional properties of somatostatin-expressing GABAergic neurons in mouse barrel cortex. *Nat Neurosci* **15**, 607–12 (2012).
- [8] Pfeffer, C. K., Xue, M., He, M., Huang, Z. J. & Scanziani, M. Inhibition of inhibition in visual cortex: the logic of connections between molecularly distinct interneurons. *Nat Neurosci* **16**, 1068–76 (2013).



- [9] Fino, E. & Yuste, R. Dense inhibitory connectivity in neocortex. *Neuron* **69**, 1188–203 (2011).
- [10] Larkman, A. U. Dendritic morphology of pyramidal neurones of the visual cortex of the rat: III. spine distributions. *J Comp Neurol* **306**, 332–43 (1991).
- [11] Elston, G. N., Benavides-Piccione, R. & Defelipe, J. A study of pyramidal cell structure in the cingulate cortex of the macaque monkey with comparative notes on inferotemporal and primary visual cortex. *Cereb Cortex* **15**, 64–73 (2005).
